# Supplementary material for: Integrating HIV, diabetes and hypertension services in Africa: study protocol for a cluster randomised trial in Tanzania and Uganda
Source: PubMed Central journal article supplement — BMJ Open. 2021 Oct 13;11(10):e047979. doi: 10.1136/bmjopen-2020-047979 (PMC8515479; doi:10.1136/bmjopen-2020-047979), 2021-10-13
Supplement: bmjopen-2020-047979.draft_revisions.pdf [file bmjopen-2020-047979.draft_revisions.pdf]

# BMJ Open

BMJ Open is committed to open peer review. As part of this commitment we make the peer review history of every article we publish publicly available.

When an article is published we post the peer reviewers' comments and the authors' responses online. We also post the versions of the paper that were used during peer review. These are the versions that the peer review comments apply to.

The versions of the paper that follow are the versions that were submitted during the peer review process. They are not the versions of record or the final published versions. They should not be cited or distributed as the published version of this manuscript.

BMJ Open is an open access journal and the full, final, typeset and author-corrected version of record of the manuscript is available on our site with no access controls, subscription charges or pay-per-view fees (<http://bmjopen.bmj.com>).

If you have any questions on BMJ Open's open peer review process please email [info.bmjopen@bmj.com](mailto:info.bmjopen@bmj.com)

# BMJ Open

## Integrating HIV, diabetes and hypertension services in Africa: study protocol for a cluster-randomised trial in Tanzania and Uganda.

|                               |                                                                                                                                                                                                                                                                                                                                                                                                                                                                                                                                                                                                                                                                                                                                                                                                                                                                                                                                                                                                                                                                                                                                                                                                                                                                                                                                                                                                                                                                                                                                                                                                                                                                                                                                                                                                                                                                                                                                                                                                                                                                                                                                                                                                                                                              |
|-------------------------------|--------------------------------------------------------------------------------------------------------------------------------------------------------------------------------------------------------------------------------------------------------------------------------------------------------------------------------------------------------------------------------------------------------------------------------------------------------------------------------------------------------------------------------------------------------------------------------------------------------------------------------------------------------------------------------------------------------------------------------------------------------------------------------------------------------------------------------------------------------------------------------------------------------------------------------------------------------------------------------------------------------------------------------------------------------------------------------------------------------------------------------------------------------------------------------------------------------------------------------------------------------------------------------------------------------------------------------------------------------------------------------------------------------------------------------------------------------------------------------------------------------------------------------------------------------------------------------------------------------------------------------------------------------------------------------------------------------------------------------------------------------------------------------------------------------------------------------------------------------------------------------------------------------------------------------------------------------------------------------------------------------------------------------------------------------------------------------------------------------------------------------------------------------------------------------------------------------------------------------------------------------------|
| Journal:                      | <i>BMJ Open</i>                                                                                                                                                                                                                                                                                                                                                                                                                                                                                                                                                                                                                                                                                                                                                                                                                                                                                                                                                                                                                                                                                                                                                                                                                                                                                                                                                                                                                                                                                                                                                                                                                                                                                                                                                                                                                                                                                                                                                                                                                                                                                                                                                                                                                                              |
| Manuscript ID                 | bmjopen-2020-047979                                                                                                                                                                                                                                                                                                                                                                                                                                                                                                                                                                                                                                                                                                                                                                                                                                                                                                                                                                                                                                                                                                                                                                                                                                                                                                                                                                                                                                                                                                                                                                                                                                                                                                                                                                                                                                                                                                                                                                                                                                                                                                                                                                                                                                          |
| Article Type:                 | Protocol                                                                                                                                                                                                                                                                                                                                                                                                                                                                                                                                                                                                                                                                                                                                                                                                                                                                                                                                                                                                                                                                                                                                                                                                                                                                                                                                                                                                                                                                                                                                                                                                                                                                                                                                                                                                                                                                                                                                                                                                                                                                                                                                                                                                                                                     |
| Date Submitted by the Author: | 14-Dec-2020                                                                                                                                                                                                                                                                                                                                                                                                                                                                                                                                                                                                                                                                                                                                                                                                                                                                                                                                                                                                                                                                                                                                                                                                                                                                                                                                                                                                                                                                                                                                                                                                                                                                                                                                                                                                                                                                                                                                                                                                                                                                                                                                                                                                                                                  |
| Complete List of Authors:     | <p>Mfinanga, Sayoki; National Institute for Medical Research Muhimbili Research Centre, Muhimbili Medical Research Centre<br/> Nyrienda, Moffat; MRC/UVRI and LSHTM Uganda Research Unit<br/> Mutungi, Gerald; Republic of Uganda Ministry of Health, Non-Communicable Diseases Control Programme<br/> Mghamba, Janneth; Ministry of Health Community Development Gender Elderly and Children, Directors office<br/> Maongezi, Sarah; Ministry of Health Community Development Gender Elderly and Children, Non-Communicable Diseases Control Programme<br/> Musinguzi, Joshua; Republic of Uganda Ministry of Health, AIDS Control Programme<br/> Okebe, Joseph; Liverpool School of Tropical Medicine<br/> Kivuyo, Sokoine; National Institute for Medical Research<br/> Birungi, Josephine; MRC/UVRI and LSHTM Uganda Research Unit<br/> van Widenfelt, Erik; Liverpool School of Tropical Medicine<br/> Van Hout, Marie-Claire; Liverpool John Moores University, Public Health Institute<br/> Bachmann, Max; University of East Anglia, Norwich Medical School, Faculty of Medicine and Health Sciences<br/> Garrib, Anupam; Liverpool School of Tropical Medicine<br/> Bukonya, Dominic; MRC/UVRI and LSHTM Uganda Research Unit<br/> Cullen, Walter; University College Dublin School of Medicine, School of Medicine<br/> Lazarus, Jeffrey; Barcelona Institute for Global Health, Hospital Clínic, University of Barcelona<br/> Niessen, Louis; Liverpool School of Tropical Medicine, Health Economics<br/> Katahoire, Anne; Makerere University College of Health Sciences<br/> Shayo, Elizabeth; National Institute for Medical Research, Policy Analysis and Advocacy<br/> Namakoola, Ivan; MRC/UVRI and LSHTM Uganda Research Unit<br/> Ramaiya, Kaushik; Shree Hindu Mandal Hospital<br/> Wang, Duolao; Liverpool School of Tropical Medicine, Department of Clinical Sciences<br/> Cuevas, LE; Liverpool School of Tropical Medicine<br/> Etukoit, Bernard; The AIDS Support Organization<br/> Lutale, Janet; Muhimbili University of Health and Allied Sciences<br/> Meshack, Shimwela ; Amana regional referral hospital<br/> Mugisha , Kenneth; The AIDS Support Organization<br/> Gill, Geoff; Liverpool School of Tropical Medicine</p> |

1  
2  
3  
4  
5  
6  
7  
8  
9  
10  
11  
12  
13  
14  
15  
16  
17  
18  
19  
20  
21  
22  
23  
24  
25  
26  
27  
28  
29  
30  
31  
32  
33  
34  
35  
36  
37  
38  
39  
40  
41  
42  
43  
44  
45  
46  
47  
48  
49  
50  
51  
52  
53  
54  
55  
56  
57  
58  
59  
60

|           |                                                                                                                                                                                                                                                     |
|-----------|-----------------------------------------------------------------------------------------------------------------------------------------------------------------------------------------------------------------------------------------------------|
|           | Sewankambo, Nelson; Makerere University College of Health Sciences<br>Smith, Peter; London School of Hygiene & Tropical Medicine, MRC<br>International Epidemiology and Statistics Group<br>Jaffar, Shabbar; Liverpool School of Tropical Medicine, |
| Keywords: | PUBLIC HEALTH, DIABETES & ENDOCRINOLOGY, Hypertension <<br>CARDIOLOGY, HIV & AIDS < INFECTIOUS DISEASES                                                                                                                                             |
|           |                                                                                                                                                                                                                                                     |

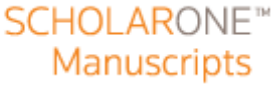

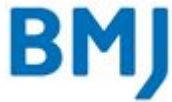

I, the Submitting Author has the right to grant and does grant on behalf of all authors of the Work (as defined in the below author licence), an exclusive licence and/or a non-exclusive licence for contributions from authors who are: i) UK Crown employees; ii) where BMJ has agreed a CC-BY licence shall apply, and/or iii) in accordance with the terms applicable for US Federal Government officers or employees acting as part of their official duties; on a worldwide, perpetual, irrevocable, royalty-free basis to BMJ Publishing Group Ltd ("BMJ") its licensees and where the relevant Journal is co-owned by BMJ to the co-owners of the Journal, to publish the Work in this journal and any other BMJ products and to exploit all rights, as set out in our [licence](#).

The Submitting Author accepts and understands that any supply made under these terms is made by BMJ to the Submitting Author unless you are acting as an employee on behalf of your employer or a postgraduate student of an affiliated institution which is paying any applicable article publishing charge ("APC") for Open Access articles. Where the Submitting Author wishes to make the Work available on an Open Access basis (and intends to pay the relevant APC), the terms of reuse of such Open Access shall be governed by a Creative Commons licence – details of these licences and which [Creative Commons](#) licence will apply to this Work are set out in our licence referred to above.

Other than as permitted in any relevant BMJ Author's Self Archiving Policies, I confirm this Work has not been accepted for publication elsewhere, is not being considered for publication elsewhere and does not duplicate material already published. I confirm all authors consent to publication of this Work and authorise the granting of this licence.

## Integrating HIV, diabetes and hypertension services in Africa: study protocol for a cluster-randomised trial in Tanzania and Uganda.

Sayoki Godfrey Mfinanga <sup>1,2 \*</sup>, Moffat J Nyirenda <sup>3\*</sup>, Gerald Mutungi <sup>4</sup>, Janneth Mghamba <sup>5</sup>, Sarah Maongezi <sup>6</sup>, Joshua Musinguzi <sup>7</sup>, Joseph Okebe <sup>8</sup>, Sokoine Kivuyo <sup>1</sup>, Josephine Birungi <sup>3</sup>, Erik van Widenfelt <sup>8</sup>, Marie Claire van Hout <sup>9</sup>, Max Bachmann <sup>10</sup>, Anupam Garrib <sup>8</sup>, Dominic Bukonya <sup>3</sup>, Walter Cullen <sup>11</sup>, Jeffrey Victor Lazarus <sup>12</sup>, Louis Wihelmus Niessen <sup>8</sup>, Anne Katahoire <sup>13</sup>, Elizabeth Henry Shayo <sup>1</sup>, Ivan Namakoola <sup>3</sup>, Kaushik Ramaiya <sup>14</sup>, Duolao Wang <sup>8</sup>, LE Cuevas <sup>8</sup>, Bernard M Etukoit <sup>15</sup>, Janet Lutale <sup>2</sup>, Shimwela Meshack <sup>16</sup>, Kenneth Mugisha <sup>15</sup>, Geoff Gill <sup>8</sup>, Nelson Sewankambo <sup>13+</sup>, Peter Smith <sup>17+</sup> Shabbar Jaffar <sup>8+</sup>

\* contributed equally

+ contributed equally

1. National Institute for Medical Research, Dar es Salaam, Tanzania
2. Muhimbili University of Health and Allied Sciences, Dar es Salaam, Tanzania
3. MRC/UVRI & LSHTM Uganda Research Unit, Entebbe, Uganda
4. Non-Communicable Diseases Control Programme, Ministry of Health, Uganda
5. Directors Office, Ministry of Health, Community Development, Gender, Elderly and Children, Tanzania.
6. Non-Communicable Diseases Control Programme, Ministry of Health, Ministry of Health, Community Development, Gender, Elderly and Children, Tanzania.
7. AIDS Control Programme, Ministry of Health, Uganda
8. Liverpool School of Tropical Medicine, Pembroke Place, Liverpool, L3 5QA
9. Public Health Institute, Liverpool John Moores University, Liverpool.
10. Norwich Medical School, Faculty of Medicine and Health Sciences, University of East Anglia, Norwich, UK
11. School of Medicine, University College Dublin, Dublin, Ireland
12. Barcelona Institute for Global Health (ISGlobal), Hospital Clinic, University of Barcelona, Instituto de Salud Global de Barcelona, Barcelona, Spain
13. Makerere University College of Health Sciences, Kampala, Uganda
14. Hindu Mandal Hospital, Dar es Salaam, Tanzania
15. The AIDS Support Organisation, Kampala, Uganda
16. Amana Regional Referral Hospital, Dar es Salaam, Tanzania
17. MRC International Epidemiology and Statistics Group, London School of Hygiene & Tropical Medicine, Keppel Street, London WC1E 7HT

## ABSTRACT

### Introduction

HIV programmes in sub Saharan Africa are well-funded but programmes for diabetes and hypertension are weak with only a small proportion of patients in regular care. Health care provision is organised from stand-alone clinics. In this cluster-randomised trial, we are evaluating a concept of integrated care for people with HIV-infection, diabetes or hypertension from a single point of care.

### Methods and Analysis

32 primary care health facilities in Dar es Salaam and Kampala regions were randomised to either integrated or standard vertical care in a 1:1 ratio. In the integrated care arm, services are organised from a single clinic where patients with either HIV-infection, diabetes, hypertension or combinations of these are managed by the same clinical and counselling teams. They use the same pharmacy and laboratory and have the same style of patient records. Standard care involves separate pathways, i.e. separate clinics, waiting and counselling areas, a separate pharmacy and separate medical records.

The trial has 2 primary endpoints: retention in care of people with hypertension or diabetes and plasma viral load suppression. Recruitment is expected to take 3-6 months and follow-up is for 12 months.

With 100 participants enrolled in each facility with diabetes or hypertension, the trial will provide 90% power to detect an absolute difference in retention of 15% between the two study arms (at the 5% two-sided significance level). If 100 participants with HIV-infection are also enrolled in each facility, we will have 90% power to show non-inferiority in virological suppression between the 2 arms to a  $\delta=10\%$  margin (i.e. that the upper limit of the one-sided 95% confidence interval of the difference between the two arms will not exceed 10%). To allow for loss to follow-up, the trial will enrol over 220 persons per facility.

This is the only randomised trial of its kind evaluating the concept of a single integrated clinic for high-burden chronic conditions in Africa, designed to generate policy-relevant evidence.

### Ethics and Dissemination

The protocol has been approved by ethics committee of The AIDS Support Organisation, National Institute of Medical Research and the Liverpool School of Tropical Medicine.

Dissemination of findings will be done through journal publications and meetings involving study participants, health care providers and other stakeholders.

Trial registration: ISRCTN43896688

### Strengths of this trial

- This is the largest trial of its kind with replication in over 30 health facilities and 2 countries.
- It was designed, implemented and is being monitored in partnership with patient representatives, health care providers, policy makers and other stakeholders.
- The trial is measuring objective markers of effectiveness and is multidisciplinary.

### Limitations of this trial

- The trial has a relatively short follow-up of 12 months and cannot estimate effect against mortality or other longer-term outcomes.

- The trial cannot be blinded – both health care providers and patients know the intervention being delivered at each health facility.

## INTRODUCTION

**The problem:** In sub Saharan Africa, over 2 million deaths a year are attributed to hypertension and diabetes annually and this number is rising rapidly<sup>1-3</sup>. Health service provision is limited<sup>4-6</sup> and only about 5-10% of people living with diabetes and hypertension are thought to be in regular care<sup>1,6-9</sup>. The burden of HIV is also high but in contrast to the situation with other chronic diseases, about 70% of people known to be living with HIV-infection are accessing antiretroviral therapy<sup>10</sup>.

There is substantial variation in how hypertension and diabetes services are organised. Hypertension is often managed in primary care outpatient clinics while diabetes is usually managed in separate standalone clinics and in higher-level health facilities, typically district hospitals and larger health centres. In some facilities, hypertension and diabetes services are run from dedicated clinics, but these are often held on different days.

In contrast, HIV programmes are comparatively better funded<sup>10,11</sup> and HIV-care is delivered in standalone vertical programmes in primary care facilities across Africa, effectively through a separate health system with separate consultation rooms and waiting areas, separate pharmacies, and separate counselling services. Drug supply chains and funding streams for the HIV programmes are also separate.

Bringing services together for common chronic conditions could be beneficial from the health service perspective and also for patients but carries a number of risks.

**What are the potential benefits of integrating services for chronic conditions?** Staff in HIV clinics have acquired experience over many years in managing HIV as a chronic disease, including diagnosing those infected, linking and retaining HIV positive patients in care, supporting treatment adherence, and procuring drugs and diagnostics. Integration of services would mean that these practices can be applied quickly to diabetes and hypertension control. It would reduce duplication and fragmentation of services and could be more efficient compared with vertically delivered care. Integration would be particularly popular for people with multiple chronic conditions, who at present attend different clinics that are often run on different days and sometimes at different locations. Finally, HIV has had a special status (often referred to as “exceptionalism”), and this has contributed to stigma and discrimination<sup>12,13</sup>. Managing HIV-infection like any other chronic condition, such as in an integrated model of care, could reduce the stigma.

**What are the potential risks of integration of services?** Integration of chronic care services may reduce the focus on HIV care and may worsen HIV outcomes, which have been painstakingly achieved over many years. Patients with diabetes and hypertension might be reluctant to visit clinics attended by people living with HIV-infection, given the stigma associated with being HIV-infected. Likewise, people living with HIV-infection might be reluctant to visit clinics where there are people with diabetes and hypertension attending as this may disclose their HIV status.

Diabetes is commonly managed by specialist physicians in the larger health facilities whereas HIV is now usually managed in primary care. Integration may lead to opposition from specialist physicians

1  
2  
3 feeling that they should manage diabetes rather than generalists in a primary care clinic. It may lead  
4 to a decrease in the quality of diabetes care if health care workers in the integrated clinic are not  
5 trained sufficiently or if they cannot manage demand. Finally, disease control managers will be  
6 concerned that funding for diabetes care may decline if integration gives the impression people with  
7 diabetes are now taken care of by the (well-funded) HIV programmes.  
8  
9

10 **Background evidence on integration.** There is little or no evidence that integration of primary care  
11 health services improves the health status of people in low or middle income countries <sup>14,15</sup>. Studies  
12 evaluating complete integration for people living with any one or more chronic conditions are  
13 particularly scarce <sup>16</sup>. We found one study from a Medecins Sans Frontieres - supported health facility  
14 serving an informal settlement in Nairobi, Kenya. Patients with either HIV-infection or non-  
15 communicable conditions (mostly hypertension) were seen together for basic monitoring and  
16 provision of drugs. However, the study size was just 1432 patients, it was retrospective and done at  
17 a single site <sup>17</sup>. Limited evidence is also available from South Africa <sup>18,19</sup>, but the health system here is  
18 much stronger and findings difficult to generalise to other parts of sub Saharan Africa.  
19  
20

21 Given the limited evidence, we first conducted a large preliminary study to evaluate the  
22 acceptability and feasibility of integration of services for HIV-infection, diabetes and hypertension in  
23 Tanzania and Uganda. We enrolled 2273 participants in a single-arm cohort study to receive  
24 integrated care from 10 health facilities and followed the cohort for between 6-12 months. Very few  
25 declined to join the study and retention exceeded 80% at the end of the study. Here we present the  
26 plans for a large randomised trial that follows the initial study and is designed to inform policy.  
27  
28  
29

## 30 **METHODS**

31  
32 The INTE-AFRICA trial is a pragmatic parallel arm cluster randomised-controlled trial, comparing  
33 integrated health services for HIV-infection diabetes and hypertension with a standard care  
34 approach (i.e. stand-alone care) in Tanzania and in Uganda. Health facilities have been randomised  
35 to either integrated care or current standard care. Figure 1 shows the trial schema. Procedures for  
36 enrolment and the management and follow-up of participants are identical in the two arms.  
37  
38

### 39 **The integrated care arm comprises:**

- 40 - A single clinic where patients with either HIV-infection, diabetes or hypertension are  
41 managed. Patients can have one or more of these conditions.
- 42 - There is one area where patients register and wait.
- 43 - They are managed by the same clinicians, nurses, counsellors and other staff.
- 44 - There is one pharmacy where the dispensing of medicines is integrated
- 45 - Patient records are the same for all patients
- 46 - Laboratory samples are managed and tested in the same laboratory service where possible.

### 55 **The standard care comprises:**

- 56 - Vertical care in separate clinics for HIV-infection, diabetes and hypertension, (i.e. standard  
57 current practice).



- HIV services have separate waiting areas and separate consultation rooms, a separate pharmacy, separate medical records, and laboratory samples are managed separately from those for diabetes and hypertension services
- Diabetes and hypertension services continue as they are. Patients with these conditions are usually managed in separate clinics, although blood samples usually go to the same laboratory.

**How are the clinics organised?** Thousands of patients are receiving care for HIV-infection, diabetes and hypertension at each health facility but for the sample size requirements, we only need to enrol a subset of participants at each facility. Therefore, in those facilities randomised to integration, we have set up “integrated clinics” that are standalone. In some facilities, these run on a day when the separate standalone HIV, diabetes and hypertension clinics are not operating. In others, it is run in separate rooms away from the main vertical standalone clinics. In the standard care, participants are enrolled into the research study and continue to receive standard care.

We have attempted to bring clinical staff to a common level of understanding of the management of HIV-infection, diabetes and hypertension in both the arms of the trial. Thus, government clinical and counselling staff have had classroom training on the management of HIV-infection, diabetes and hypertension for 1-2 days. Both health care and all research staff have also received training on the protocol, also for one day.

Thereafter, staff received on-the-job training for a period of one month. Within the integrated care clinics, staff specialised in one condition supported staff new to managing the other 2 conditions. For example, the doctors who have traditionally managed patients with HIV-infection periodically observe staff from diabetes and hypertension clinics treating HIV-infected patients. They provide constructive feedback and support.

Staff in the vertical standalone clinics also receive on-the-job training. Those managing the single conditions are observed at least once every week for 4 weeks. They receive constructive feedback and support.

### **Study design and setting.**

INTE-AFRICA is a parallel arm cluster-randomised trial: 32 health facilities have been randomised in the two countries – 16 to integrated care and 16 to the standard care (control arm).

The trial is being done in close to normal health service conditions, with government health care staff managing patients<sup>20</sup>. The research team organised basic training in the management of patients with chronic conditions, as mentioned above, and strengthened the provision of medicines supply for hypertension and diabetes. In Uganda, in a few health facilities in the region, groups of participants had formed ‘clubs’ whereby each patient contributes money into a single fund and uses it to purchase drugs when government supplies are limited. We kick-started these in each facility. We provided buffer drug supplies for 2 months when a facility ran short to enable the patients’ central fund to grow and after this period, the club was self-sustaining.

In Tanzania, some patients are on insurance schemes and so had a reliable medicines supply. The health facilities have an established protocol for evaluating patients that have no insurance and are not able to pay. The project provided a buffer to the facilities for the few patients that are not able to purchase the drugs.

1  
2  
3  
4 Research data collection is minimal and done mostly by trained researchers while patients wait for  
5 consultations. For our co-primary endpoint of plasma viral load suppression, samples are taken by  
6 health care staff and tested in government laboratories. Where needed, the research programme  
7 pays for the tests and the data are used by both the research team and the health care teams for  
8 patient management.  
9

### 10 **Choice of health facilities**

11  
12 INTE-AFRICA is being conducted in medium-large sized health facilities that focus on offering  
13 ambulatory care. All of the facilities are run by physicians or medical officers, supported by part-  
14 qualified physicians (clinical officers or assistant medical officers). The facilities are located in largely  
15 urban settings in Dar es Salaam in Tanzania and Kampala region in Uganda. They were selected  
16 according to the following criteria:  
17  
18

#### 19 Inclusion criteria

- 20 - Provides dedicated care for diabetes and HIV-infection in separate clinics.
- 21 - Has a minimum of n=100 patients in care with diabetes.

#### 22 Exclusion criteria

- 23 - Provide specialist referral care
- 24 - Does not provide diabetes services

25  
26 **Justification for selection strategy:** We chose to enrol facilities that have dedicated separate clinics  
27 for HIV-infection and diabetes. We have not specified hypertension in our inclusion criteria. In the  
28 health facilities where we are working, hypertension clinics are sometimes standalone and  
29 sometimes integrated with diabetes clinics, depending on the volume of patients. Since these health  
30 facilities currently provide care separately for HIV-infection and diabetes/hypertension, integration  
31 will involve the greatest change for the health facility and therefore the greatest advance in  
32 knowledge.  
33

34 We are not intervening in large referral hospitals that offer specialised care. They act as referral  
35 centres. We are also not enrolling at smaller health facilities that do not offer diabetes services as  
36 such facilities could not act as effective control clinics for vertical care.  
37

38 Government health facilities fulfilling these criteria are large health centres (health centre IVs and a  
39 few health centre IIIs) in Uganda. In Tanzania, the comparable centres are the smaller district and  
40 municipal hospitals, and the larger health centres.  
41

42 In both Tanzania and Uganda, the not-for-profit non-governmental organisations (NGO) are  
43 responsible for a substantial amount of health care delivery, which is organised in accordance with  
44 national guidelines. They are also major players in training and strengthening health care provision  
45 in government health facilities. We are recruiting a small number of NGO-run health facilities that  
46 are similar to the government health facilities providing dedicated primary health care.  
47

48 **Enrolment of health facilities:** We chose the regions, based on ease of access for the research team.  
49 We then visited the large facilities that fulfilled the criteria above. We omitted a small number that  
50 were inaccessible.  
51  
52  
53  
54  
55  
56  
57  
58  
59  
60

### ***Choice of study participants***

The criteria are minimal so as to maximise generalisability of findings.

#### Inclusion criteria

- Adult, 18 years or older.
- Confirmed HIV-infection, diabetes or hypertension
- Living within the catchment population of the health facility
- Likely to remain in the catchment population for 6 months
- Willing to provide written informed consent.

#### Exclusion criteria

- Sick, requiring immediate hospital care

### ***Selection of participants.***

We know that at each of the study health facilities, the numbers of patients receiving diabetes care or those with multiple conditions are limited and so patients with these conditions are being enrolled consecutively.

The health facilities have a high volume of patients with HIV-infection and with hypertension. Some health facilities do not offer appointments and so there is no way of knowing who will present the next day. In larger health facilities, appointments are given out in 3-4 blocks during the day so as to spread the patient load.

Selection of patients using simple random sampling minimises bias but is difficult to achieve. Therefore, we are conducting systematic sampling to enrol patients with HIV-infection or hypertension – that is taking every 5<sup>th</sup> or 10<sup>th</sup> patient consecutively in order of their attendance at the health facility, depending on the patient load. If the study team are late arriving at the facility, or if a patient refuses to join the study, then they maintain the systematic sequence and start at the next sequence number (i.e. offer enrolment to the next 5<sup>th</sup> or next 10<sup>th</sup> patient).

In the HIV or hypertension clinics, patients' details are entered onto a clinic register when they arrive and research staff use the register to determine the first patient for enrolment, second patient and so on.

Sampled patients are then invited to participate in the trial following written informed consent.

#### **RANDOMISATION:**

The study is cluster-randomised since the intervention is delivered at a clinic level.

There is considerable variation in infrastructure and service provision between health facilities. Therefore, to ensure balance between the intervention and control arms, we stratified the randomisation. The strata comprised:

- A. District hospitals, or large health centres:
- B. Health centres or large dispensaries
- C. Not-for-profit health facilities:

1  
2  
3 Within each stratum, we randomised facilities in a 1:1 ratio to either integrated care or standard  
4 care using a permuted block randomisation method generated by SAS® PROC PLAN.  
5

6 **Why create a separate integrated care clinic?** We considered changing the mode of care entirely  
7 for all patients at each clinic to either integrated or vertical care, depending on the randomisation.  
8 This would have replicated real life health care delivery. However, it would have represented a  
9 major change for the health services, without the evidence to support such a move. It would also  
10 have meant that those people who were currently receiving vertical care and did not wish to change,  
11 would not have had the choice to continue. Therefore, although randomised by clinic, we are  
12 enrolling only a small proportion of the very many patients attending health services at the clinic. In  
13 the clinics randomised to provide integrated care, they are the sole point of integration in that  
14 facility for HIV-infection, diabetes and hypertension as integrated services are not provided  
15 anywhere else in either country.  
16  
17

#### 18 **PRIMARY ENDPOINTS:**

19  
20 The study has 2 co-primary endpoints, which will be ascertained over a 12-month follow-up:  
21  
22

- 23 - **Retention in care** for patients on diabetes and hypertension management. This is measured  
24 as the proportion of people alive and in care at 12 months of follow-up.
- 25 - **Plasma viral load suppression** among persons HIV-infected. This is defined as plasma viral  
26 load less than 100 copies per ml.  
27  
28  
29

30  
31 *Rationale:* Retention in care is fundamental to disease control and has been very low for people with  
32 diabetes or hypertension in African settings, even where health care and medicines are provided for  
33 free. It is also a common indicator to both conditions.  
34

35 We considered blood pressure and glycaemia control as primary endpoints but decided on retention  
36 as that is the immediate aim of our intervention. Once we can achieve good retention, the next  
37 stage of the research will be to assess impact on clinical indicators. At present, there are few reliable  
38 background data from Africa on blood pressure and glycaemia control achieved by populations able  
39 to access treatments. However, in high-income countries, only about 1 in 4 persons with known  
40 hypertension and 1 in 2 persons with known diabetes achieve adequate blood pressure and  
41 glycaemia control respectively, and control is poorer in low-resource settings<sup>21-24</sup>.  
42  
43

44 We also considered a disease-based composite outcome such as either a stroke, myocardial  
45 infarction, or all cause-mortality, but this would need many years of follow-up. Also, given the poor  
46 retention in care, measuring disease incidence is fraught with bias. For these reasons, we chose  
47 retention as one of the primary endpoints.  
48

49 The trial will also test whether there is an adverse effect of integrated services on HIV outcomes. In  
50 other words, does integration lead to poorer HIV viral suppression as compared with standard  
51 vertical care? To answer this question, HIV viral load was selected as a co-primary endpoint.  
52  
53

54 Secondary endpoints will include cost of illness and health care, control of blood pressure and  
55 glycaemia, and incidence of clinical events including hospital admissions and deaths.  
56

57 **Consideration of adjustment for multiplicity.** Although the study has two co-primary outcomes,  
58 they are being measured in different populations, one among people with hypertension or diabetes  
59 and the other in people with HIV-infection. The plasma viral load is also a safety outcome in that we  
60

wish test whether integration does harm to outcomes of people with HIV-infection. Therefore, we will not adjust the final analyses for multiplicity.

### Sample size considerations

*i). Retention in care endpoint.* We assumed that with the training and improved procedures, retention in care for persons with diabetes and hypertension would improve under current standard care – probably to a figure around 60 - 70%. As a comparison, for HIV-infection, this figure was around 70-80% prior to about 2006 and is generally around 90% today<sup>25</sup>.

We hypothesised that in the intervention arm, integration would lead to further improved retention rates compared with the standard vertical care for diabetes and hypertension. Thus, this endpoint was powered on an assumption of superiority.

The sample size calculation must take clustering at health facility into account (i.e. the variation between health facilities as well as variation between patients). We have done this for different values of the intra-class correlation coefficient. This is a measure of the variation between health facilities, which we can minimise between arms by stratification. In many trials, the intra-class correlation coefficient is assumed to be 0.05 but we were conservative in accepting a higher level of variation of 0.06<sup>26,27</sup>.

The calculations show that for hypertension and diabetes, if the retention in the standard vertical care arm is 60% at 12 months, then 32 facilities (16 randomised to integration and 16 to standard vertical care), with 100 patients studied in each facility, will provide 90% power to detect an absolute difference of 15% between the two study arms (i.e. a retention of 60% versus 75% respectively in the standard care and intervention arms) (Table 1). If the variation between health facilities turns out to be higher (i.e. intra-class coefficient is 0.07, power will still exceed 80%). If the retention rate in the control arm is 70%, then power to detect differences will be even higher.

We will enrol 110 patients in each of the 32 facilities to allow for a 10% refusal rate. This refusal rate is conservative as in previous large studies in these settings, our refusal rate has been close to zero<sup>28</sup>. The group of 110 patients in each facility will be a mix of persons with either diabetes or hypertension or both conditions. The total number of patients within this randomised evaluation will be 3,520.

**Table 1. Total number of facilities needed in both arms to demonstrate absolute differences of between 10% to 20% for different values of variation between health facilities (intra-class coefficient of variation) and of numbers of patients needed in each facility. The calculations assume 90% power and a 2-sided significance level of 5%.**

| Intra-class coefficient of variation | Number of patients per facility | Proportion retained in care in the integrated care arm |     |     |
|--------------------------------------|---------------------------------|--------------------------------------------------------|-----|-----|
|                                      |                                 | 70%                                                    | 75% | 80% |
| 0.05                                 | 50                              | 74                                                     | 32  | 18  |
| 0.06                                 | 50                              | 84                                                     | 36  | 20  |
| 0.07                                 | 50                              | 94                                                     | 40  | 22  |
| 0.05                                 | 100                             | 64                                                     | 28  | 16  |

|      |     |    |    |    |
|------|-----|----|----|----|
| 0.06 | 100 | 74 | 32 | 18 |
| 0.07 | 100 | 86 | 36 | 20 |
|      |     |    |    |    |
| 0.05 | 200 | 60 | 26 | 14 |
| 0.06 | 200 | 70 | 30 | 16 |
| 0.07 | 200 | 80 | 34 | 20 |
|      |     |    |    |    |

ii). *HIV plasma viral load endpoint.* The sample size for the HIV component is calculated to show non-inferiority between the integration and the standard vertical care arms. We will enrol the same number of persons with HIV-infection (3,520 comprising 110 patients in each of 32 facilities) as the number with hypertension or diabetes in the cluster-randomised trial.

The numbers of HIV-infected people with known diabetes, hypertension or both is likely to be small as testing is limited across Africa. We will enrol all patients with known multimorbidity to add to the 3,520 HIV-infected persons and 3,520 with diabetes or hypertension.

In terms of virologic suppression, if we assume that this is 85% at 12 months in the standard care arm, we will have 90% power to show non-inferiority between the 2 arms to a  $\delta=10\%$  margin (i.e. that the upper limit of the one-sided 95% confidence interval of the difference between the standard care and intervention arms will not exceed 10%). This also assumes an intra-class coefficient of variation of 0.06 and 1-sided 95% confidence interval.

### Health economics endpoints

A sub-study on costs is nested in the trial. Its aim is to provide evidence on the costs associated with accessing care for study participants and the costs of delivering care from the health providers perspective.

The economic evaluation will be based on the clinical and operational outcome parameters to define the economic effectiveness outcomes. The primary outcomes will be the incremental cost per additional person retained in the programme and the incremental cost per additional person virologically suppressed. Other outcomes will be the health care cost per patient category per year in integrated care and standard care, the average health care costs per additional patient treated and the change in the average health care costs / societal cost per additional patient with a controlled condition.

Given that costs and benefits of integrated care services may extend beyond the follow up period and that these chronic conditions have lifelong consequences, we will construct an individual-based microsimulation model to estimate the long-term and lifelong cost-effectiveness of different methods of care for patients with different conditions and explore the cost-effectiveness of future scale up of these health care approaches.

### Statistical analysis

The primary indicators will be compared between the intervention arm and standard care, while controlling for possible confounders, defined *a priori*. General estimating equation models will be used for the analysis to take account of clustering of data within health facilities.

1  
2  
3 The primary measure of effectiveness for the primary outcomes will be absolute risk differences and  
4 risk ratios. Time to event analysis – i.e. time to loss from care – will also be conducted. We will not  
5 adjust for multiple comparisons. Although we have 2 co-primary endpoints, they are in different  
6 populations.  
7

8  
9 An intention-to-treat analysis strategy will be used for the primary analysis. Every effort will be made  
10 to minimise missing outcome data at each visit. Sensitivity analyses will be conducted to assess the  
11 robustness of the missing data assumption made in the primary analysis. Detailed statistical analyses  
12 will be described in the statistical analysis plan.  
13

## 14 15 **Process Evaluation**

16  
17 Concurrent process evaluation is being done alongside the implementation of INTE-AFRICA to  
18 understand the context, description of the intervention and its causal assumptions, implementation,  
19 mechanisms of impact and outcomes and document stakeholders experiences, attitudes, and  
20 practices during implementation, and to understand the impact of structural and contextual factors  
21 (macro/meso/micro) on implementation <sup>29</sup>. This is described elsewhere <sup>30</sup>.  
22  
23

## 24 25 **Data management.**

26  
27 The study is run in accordance with good clinical practice. This involves regular monitoring of  
28 procedures and checking of data collected. A custom electronic database has been designed for the  
29 trial. Staff received training on the electronic database as well as on how to report issues and make  
30 suggestions. Trial data are collected and validated electronically in real-time with built in data-type  
31 and logic checks with the patient at the point of care. The real-time validation logic is custom to the  
32 protocol and references new and existing patient data for immediate feedback to the user. Data  
33 modifications are tracked in a comprehensive electronic audit trail so as to not obscure changes.  
34 Changes to the source code of the electronic database are tracked and versioned. The current  
35 software version is stamped on each record as it is modified.  
36  
37

38 Data may be viewed, created, modified, deleted or exported by delegated persons according to the  
39 access roles associated with their personal accounts. The sponsor and other relevant parties may be  
40 given access to data separately with suitable notice. Security of data is ensured using authentication  
41 and encryption to render subject identity and personal health information unusable, unreadable and  
42 indecipherable to unauthorised individuals. The application and database layers use a combination  
43 of hashing and field-level encryption for sensitive and personal data. Study data are not stored on  
44 devices in the field.  
45  
46

## 47 48 **Ethical issues**

49 The protocol has been approved by ethics committee of The AIDS Support Organisation, National  
50 Institute of Medical Research and the Liverpool School of Tropical Medicine. The study raises several  
51 ethical issues, primarily in relation to the limited supply of medicines for diabetes and hypertension.  
52 These are discussed in detail elsewhere <sup>31</sup>.  
53  
54

## 55 56 **Patient and Public involvement**

57 **How was the development of the research question and outcome measures informed by patients'**  
58 **priorities, experience, and preferences?**  
59  
60

1  
2  
3 We conducted a large pilot study. Integrated care clinics for patients living HIV-infection, diabetes or  
4 hypertension were set up in 10 health facilities in Tanzania and Uganda. Over 2000 patients with one  
5 or more of these chronic conditions were followed up for 6-12 months. Acceptance was high and  
6 retention in care at the study end exceeded 80%. Integrated care was particularly welcomed by  
7 patients who had more than one condition and who would otherwise visit the health facility multiple  
8 times.  
9

10  
11 Before the pilot study started, we set up steering committees in both Tanzania and Uganda, which  
12 comprised researchers, policy makers and had patient representatives. We held investigator  
13 meetings involving all of the partners. These included a patient representative and at the last  
14 meeting, held in December 2019 in Uganda (prior to the start of this trial), one of the patient  
15 representatives gave a talk on why integrated management was important to him and other  
16 patients.  
17

#### 18 **How did you involve patients in the design of this study?**

19 Patient representatives attended our planning meetings and contributed to the design of the study  
20 and other aspects of the research, such as its implementation.  
21  
22

#### 23 **Are patients involved in the recruitment to and conduct of the study?**

24 Patient representatives remain on the steering committees and are invited to the large investigator  
25 meetings. The steering committees meet every 3-6 months. At these patients, patient  
26 representatives provide input into the recruitment and conduct of the study.  
27  
28  
29

#### 30 **How will the results be disseminated to study participants?**

31 This will be done through information leaflets, written for study participants. We will distribute  
32 these to all study participants. We will also present the findings to the steering committees, which  
33 are attended by patient representatives, and publish the findings in a journal.  
34  
35

36 **For randomised controlled trials, was the burden of the intervention assessed by patients**  
37 **themselves?** The patients were fully informed about the intervention. The intervention was  
38 designed to reduce the burden of visits for patients.  
39

#### 40 **Governance and oversight.**

41 As mentioned above, each partner country has a steering committee. There is also a single  
42 international steering committee, which is chaired by and has majority participation of independent  
43 researchers, and an independent data and safety monitoring committee.  
44  
45  
46  
47

## 48 **DISCUSSION.**

49  
50 In this trial, we are testing the concept of a single chronic care clinic where people living with any  
51 one or more of the target conditions – HIV-infection, diabetes or hypertension – may come for  
52 health services and care. Very few settings in Africa have even attempted screening of people with  
53 HIV-infection for chronic conditions, despite their high prevalence. To our knowledge, there have  
54 been no attempts of a fully integrated approach to these chronic conditions as being tested in this  
55 trial.  
56  
57

58 This approach is controversial on a number of fronts. The HIV programmes are well funded and have  
59 achieved high levels of coverage of antiretroviral therapy across Africa, and we are asking them to  
60 merge with much weaker programmes. Patients have traditionally been managed in standalone



1  
2  
3 specialist clinics and were now asking them to move to management by generalist clinical staff,  
4 which will seem inferior to many specialists. Finally, patients with HIV-infection have always been  
5 segregated from others, and we are now asking everyone to sit together, which will be  
6 uncomfortable to some due to the stigma associated with HIV-infection.  
7

8  
9 Furthermore, the research programme cannot compensate government clinical staff for the added  
10 time that the research will take, pay for medicines or compensate patients for their time, unlike the  
11 situation in many clinical trials. For our findings to be relevant to policy-makers and other  
12 stakeholders, health care must be provided in close to normal health service conditions.  
13

14 Central to the success of such research is the development of partnerships with policy makers,  
15 health care managers and providers, patient groups and community representatives. Each of these  
16 stakeholders, in particular the policy makers, are consulted at regular intervals and to date, they  
17 have given considerable time in setting the research strategy and the design and implementation of  
18 the research studies. Over time we created formal structures to ensure their voices were heard.  
19 Each country has a steering committee that includes representatives of the stakeholders, and which  
20 meets at least 3-monthly. We also have an international steering committee, which includes  
21 representation from the different partners and is dominated by independent researchers.  
22  
23

24 The study also involves researchers from multiple different disciplines, including clinical trialists and  
25 statisticians, social scientists and health economists, clinical researchers and programme managers  
26 and from both African and European institutions. Crucial to the success of the research programme  
27 to date has been that we operate on an ethos of equality and openness. This means that meetings  
28 are inclusive opportunity and support where needed is given to people to contribute. We have also  
29 invested in training in communications and unconscious bias.  
30  
31

32 We have focussed on just 3 conditions, and of the non-communicable conditions, we chose diabetes  
33 and hypertension as these are responsible for a very high disease burden and are probably more  
34 modifiable by intervention than many other chronic conditions. However, we see the test of these 3  
35 conditions in integration as a test of proof of concept so that if integration is shown to be effective,  
36 expansion to include other conditions could be considered.  
37  
38

39 Although the trial is large, we are testing integration in a small proportion of patients attending  
40 health facilities. The evidence was simply lacking to change the health care model at each clinic.  
41 Thus, further research will be needed to estimate the effects of transforming entire clinics to  
42 integration.  
43  
44

45 We did consider other study designs to answer our question. For example, it would have been  
46 possible to recruit patients in integrated and in vertical care from the same health facilities as the  
47 clinics often run on different days. This could have reduced costs; but risked greater contamination  
48 between the intervention and control arms and risked confusion among busy clinical staff and  
49 facility managers.  
50  
51

52 A challenge of such cluster-randomised trials is that participants and clinicians cannot be blinded,  
53 and further, that people may have their biases of which intervention should work. Thus, we have  
54 restricted evaluation to largely biomedical objective endpoints. We also train staff regularly,  
55 reminding them of the critical role of equipoise in trials.  
56  
57  
58  
59  
60

### Contributorship statement.

SM, MJN, SJ wrote the original protocol, secured funding and wrote the first draft of the protocol. All authors contributed to the design of the study and to various versions of the protocol and this paper. JL, GG, NKS, PGS, AK oversaw the study as members of the study steering committee. SK, JB, IN, co-ordinated the implementation of the study in Tanzania and Uganda with support from JO. EVW designed the data systems.

We would like to thank all of our patient representatives and focus discussion groups who have contributed to our research.

### Competing interests

There are no competing interests for any author

### Funding

This work is funded by the EU Horizon 2020 programme, grant number 825698.

### REFERENCES

1. Atun R, Davies JI, Gale EAM, et al. Diabetes in sub-Saharan Africa: from clinical care to health policy. *Lancet Diabetes Endocrinol* 2017; **5**(8): 622-67.
2. Global Burden of Disease: Risk Factor collaborators. Global, regional, and national comparative risk assessment of 79 behavioural, environmental and occupational, and metabolic risks or clusters of risks, 1990-2015: a systematic analysis for the Global Burden of Disease Study 2015. *Lancet* 2016; **388**(10053): 1659-724.
3. World Health Organisation fact sheet. (accessed 4th April 2020).
4. Nuche-Berenguer B, Kupfer LE. Readiness of Sub-Saharan Africa Healthcare Systems for the New Pandemic, Diabetes: A Systematic Review. *J Diabetes Res* 2018; **2018**: 9262395.
5. Peck R, Mghamba J, Vanobberghen F, et al. Preparedness of Tanzanian health facilities for outpatient primary care of hypertension and diabetes: a cross-sectional survey. *Lancet Glob Health* 2014; **2**(5): e285-92.
6. Katende D, Mutungi G, Baisley K, et al. Readiness of Ugandan health services for the management of outpatients with chronic diseases. *Trop Med Int Health* 2015; **20**(10): 1385-95.
7. Addo J, Smeeth L, Leon DA. Hypertension in sub-saharan Africa: a systematic review. *Hypertension* 2007; **50**(6): 1012-8.
8. Jaffar S, Gill G. The crisis of diabetes in sub-Saharan Africa. *Lancet Diabetes Endocrinol* 2017; **5**(8): 574-5.
9. Manne-Goehler J, Atun R, Stokes A, et al. Diabetes diagnosis and care in sub-Saharan Africa: pooled analysis of individual data from 12 countries. *Lancet Diabetes Endocrinol* 2016; **4**(11): 903-12.
10. UNAIDS. Fact Sheet. 2019.
11. Ford N, Ball A, Baggaley R, et al. The WHO public health approach to HIV treatment and care: looking back and looking ahead. *Lancet Infect Dis* 2018; **18**(3): e76-e86.
12. Andersson GZ, Reinius M, Eriksson LE, et al. Stigma reduction interventions in people living with HIV to improve health-related quality of life. *Lancet HIV* 2020; **7**(2): e129-e40.
13. Bekker LG, Alleyne G, Baral S, et al. Advancing global health and strengthening the HIV response in the era of the Sustainable Development Goals: the International AIDS Society-Lancet Commission. *Lancet* 2018; **392**(10144): 312-58.
14. Dudley L, Garner P. Strategies for integrating primary health services in low- and middle-income countries at the point of delivery. *Cochrane Database Syst Rev* 2011; (7): CD003318.

15. Haregu TN, Setswe G, Elliott J, Oldenburg B. Integration of HIV/AIDS and noncommunicablediseases in developing countries: rationale, policies and models. *Int J Healthcare* 2015; **1**(1): 21-7.
16. Haldane V, Legido-Quigley H, Chuah FLH, et al. Integrating cardiovascular diseases, hypertension, and diabetes with HIV services: a systematic review. *AIDS Care* 2018; **30**(1): 103-15.
17. Khabala KB, Edwards JK, Baruani B, et al. Medication Adherence Clubs: a potential solution to managing large numbers of stable patients with multiple chronic diseases in informal settlements. *Trop Med Int Health* 2015; **20**(10): 1265-70.
18. Ameh S. Evaluation of an integrated HIV and hypertension management model in rural south africa: a mixed methods approach. *Glob Health Action* 2020; **13**(1): 1750216.
19. Mahomed OH, Asmall S. Development and implementation of an integrated chronic disease model in South Africa: lessons in the management of change through improving the quality of clinical practice. *Int J Integr Care* 2015; **15**: e038.
20. Jaffar S, Amuron B, Birungi J, et al. Integrating research into routine service delivery in an antiretroviral treatment programme: lessons learnt from a cluster randomized trial comparing strategies of HIV care in Jinja, Uganda. *Trop Med Int Health* 2008; **13**(6): 795-800.
21. (CDC) CfDCaP. Hypertension Cascade: Hypertension Prevalence, Treatment and Control Estimates Among US Adults Aged 18 Years and Older Applying the Criteria From the American College of Cardiology and American Heart Association’s 2017 Hypertension Guideline—NHANES 2013–2016. <https://millionhearts.hhs.gov/data-reports/hypertension-prevalence.html>. 2019 (accessed 12 November 2020).
22. Gill G, Gebrekidan A, English P, Wile D, Tesfaye S. Diabetic complications and glycaemic control in remote North Africa. *QJM* 2008; **101**(10): 793-8.
23. Manne-Goehler J, Geldsetzer P, Agoudavi K, et al. Health system performance for people with diabetes in 28 low- and middle-income countries: A cross-sectional study of nationally representative surveys. *PLoS Med* 2019; **16**(3): e1002751.
24. Mills KT, Bundy JD, Kelly TN, et al. Global Disparities of Hypertension Prevalence and Control: A Systematic Analysis of Population-Based Studies From 90 Countries. *Circulation* 2016; **134**(6): 441-50.
25. Rosen S, Fox MP, Gill CJ. Patient retention in antiretroviral therapy programs in sub-Saharan Africa: a systematic review. *PLoS Med* 2007; **4**(10): e298.
26. Adams G, Gulliford MC, Ukoumunne OC, Eldridge S, Chinn S, Campbell MJ. Patterns of intra-cluster correlation from primary care research to inform study design and analysis. *J Clin Epidemiol* 2004; **57**(8): 785-94.
27. Campbell MK, Fayers PM, Grimshaw JM. Determinants of the intracluster correlation coefficient in cluster randomized trials: the case of implementation research. *Clin Trials* 2005; **2**(2): 99-107.
28. Mfinanga S, Chanda D, Kivuyo SL, et al. Cryptococcal meningitis screening and community-based early adherence support in people with advanced HIV infection starting antiretroviral therapy in Tanzania and Zambia: an open-label, randomised controlled trial. *Lancet* 2015; **385**(9983): 2173-82.
29. Craig P, Dieppe P, Macintyre S, et al. Developing and evaluating complex interventions: the new Medical Research Council guidance. *BMJ* 2008; **337**: a1655.
30. Van Hout MC, Bachmann M, Lazarus JV, et al. Strengthening integration of chronic care in Africa: protocol for the qualitative process evaluation of integrated HIV, diabetes and hypertension care in a cluster randomised controlled trial in Tanzania and Uganda. *BMJ Open* 2020; **10**(10): e039237.
31. Shayo E, Van Hout MC, Birungi J, et al. Ethical issues in intervention studies on the prevention and management of diabetes and hypertension in sub-Saharan Africa. *BMJ Glob Health* 2020; **5**(7).

1  
2  
3  
4  
5 **Figure legends**  
6  
7  
8

9 **Figure 1:**

10 Trial schema. The INTE-AFRICA trial: a pragmatic parallel arm cluster-randomised trial  
11  
12  
13  
14  
15  
16  
17  
18  
19  
20  
21  
22  
23  
24  
25  
26  
27  
28  
29  
30  
31  
32  
33  
34  
35  
36  
37  
38  
39  
40  
41  
42  
43  
44  
45  
46  
47  
48  
49  
50  
51  
52  
53  
54  
55  
56  
57  
58  
59  
60

For peer review only

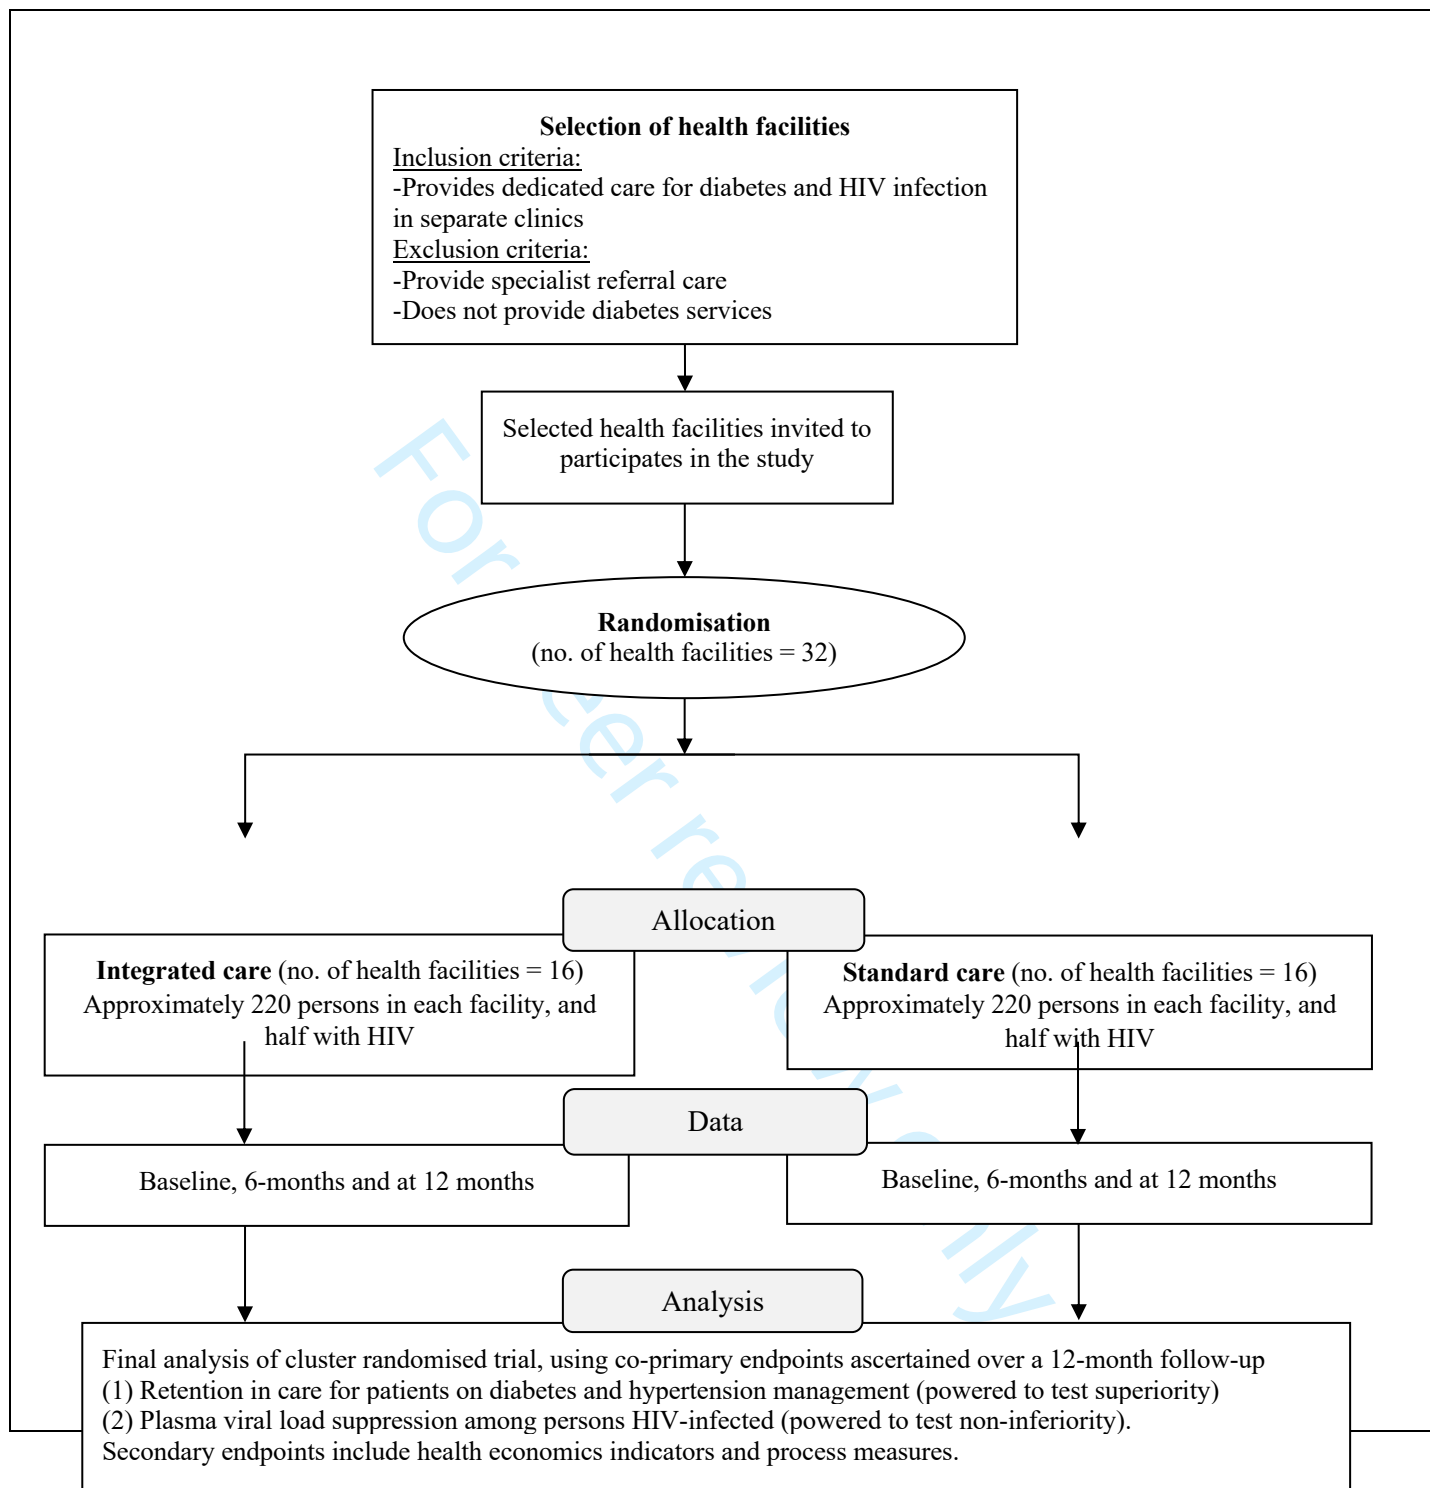

# BMJ Open

## Integrating HIV, diabetes and hypertension services in Africa: study protocol for a cluster-randomised trial in Tanzania and Uganda.

|                               |                                                                                                                                                                                                                                                                                                                                                                                                                                                                                                                                                                                                                                                                                                                                                                                                                                                                                                                                                                                                                                                                                                                                                                                                                                                                                                                                                                                                                                                                                                                                                                                                                                                                                                                                                                                                                                                                                                                                                                                                                                                                                                                                                                                                                                                              |
|-------------------------------|--------------------------------------------------------------------------------------------------------------------------------------------------------------------------------------------------------------------------------------------------------------------------------------------------------------------------------------------------------------------------------------------------------------------------------------------------------------------------------------------------------------------------------------------------------------------------------------------------------------------------------------------------------------------------------------------------------------------------------------------------------------------------------------------------------------------------------------------------------------------------------------------------------------------------------------------------------------------------------------------------------------------------------------------------------------------------------------------------------------------------------------------------------------------------------------------------------------------------------------------------------------------------------------------------------------------------------------------------------------------------------------------------------------------------------------------------------------------------------------------------------------------------------------------------------------------------------------------------------------------------------------------------------------------------------------------------------------------------------------------------------------------------------------------------------------------------------------------------------------------------------------------------------------------------------------------------------------------------------------------------------------------------------------------------------------------------------------------------------------------------------------------------------------------------------------------------------------------------------------------------------------|
| Journal:                      | <i>BMJ Open</i>                                                                                                                                                                                                                                                                                                                                                                                                                                                                                                                                                                                                                                                                                                                                                                                                                                                                                                                                                                                                                                                                                                                                                                                                                                                                                                                                                                                                                                                                                                                                                                                                                                                                                                                                                                                                                                                                                                                                                                                                                                                                                                                                                                                                                                              |
| Manuscript ID                 | bmjopen-2020-047979.R1                                                                                                                                                                                                                                                                                                                                                                                                                                                                                                                                                                                                                                                                                                                                                                                                                                                                                                                                                                                                                                                                                                                                                                                                                                                                                                                                                                                                                                                                                                                                                                                                                                                                                                                                                                                                                                                                                                                                                                                                                                                                                                                                                                                                                                       |
| Article Type:                 | Protocol                                                                                                                                                                                                                                                                                                                                                                                                                                                                                                                                                                                                                                                                                                                                                                                                                                                                                                                                                                                                                                                                                                                                                                                                                                                                                                                                                                                                                                                                                                                                                                                                                                                                                                                                                                                                                                                                                                                                                                                                                                                                                                                                                                                                                                                     |
| Date Submitted by the Author: | 08-Jun-2021                                                                                                                                                                                                                                                                                                                                                                                                                                                                                                                                                                                                                                                                                                                                                                                                                                                                                                                                                                                                                                                                                                                                                                                                                                                                                                                                                                                                                                                                                                                                                                                                                                                                                                                                                                                                                                                                                                                                                                                                                                                                                                                                                                                                                                                  |
| Complete List of Authors:     | <p>Mfinanga, Sayoki; National Institute for Medical Research Muhimbili Research Centre, Muhimbili Medical Research Centre<br/> Nyrienda, Moffat; MRC/UVRI and LSHTM Uganda Research Unit<br/> Mutungi, Gerald; Republic of Uganda Ministry of Health, Non-Communicable Diseases Control Programme<br/> Mghamba, Janneth; Ministry of Health Community Development Gender Elderly and Children, Directors office<br/> Maongezi, Sarah; Ministry of Health Community Development Gender Elderly and Children, Non-Communicable Diseases Control Programme<br/> Musinguzi, Joshua; Republic of Uganda Ministry of Health, AIDS Control Programme<br/> Okebe, Joseph; Liverpool School of Tropical Medicine<br/> Kivuyo, Sokoine; National Institute for Medical Research<br/> Birungi, Josephine; MRC/UVRI and LSHTM Uganda Research Unit<br/> van Widenfelt, Erik; Liverpool School of Tropical Medicine<br/> Van Hout, Marie-Claire; Liverpool John Moores University, Public Health Institute<br/> Bachmann, Max; University of East Anglia, Norwich Medical School, Faculty of Medicine and Health Sciences<br/> Garrib, Anupam; Liverpool School of Tropical Medicine<br/> Bukonya, Dominic; MRC/UVRI and LSHTM Uganda Research Unit<br/> Cullen, Walter; University College Dublin School of Medicine, School of Medicine<br/> Lazarus, Jeffrey; Barcelona Institute for Global Health, Hospital Clínic, University of Barcelona<br/> Niessen, Louis; Liverpool School of Tropical Medicine, Health Economics<br/> Katahoire, Anne; Makerere University College of Health Sciences<br/> Shayo, Elizabeth; National Institute for Medical Research, Policy Analysis and Advocacy<br/> Namakoola, Ivan; MRC/UVRI and LSHTM Uganda Research Unit<br/> Ramaiya, Kaushik; Shree Hindu Mandal Hospital<br/> Wang, Duolao; Liverpool School of Tropical Medicine, Department of Clinical Sciences<br/> Cuevas, LE; Liverpool School of Tropical Medicine<br/> Etukoit, Bernard; The AIDS Support Organization<br/> Lutale, Janet; Muhimbili University of Health and Allied Sciences<br/> Meshack, Shimwela ; Amana regional referral hospital<br/> Mugisha , Kenneth; The AIDS Support Organization<br/> Gill, Geoff; Liverpool School of Tropical Medicine</p> |

|                                  |                                                                                                                                                                                                                                                     |
|----------------------------------|-----------------------------------------------------------------------------------------------------------------------------------------------------------------------------------------------------------------------------------------------------|
|                                  | Sewankambo, Nelson; Makerere University College of Health Sciences<br>Smith, Peter; London School of Hygiene & Tropical Medicine, MRC<br>International Epidemiology and Statistics Group<br>Jaffar, Shabbar; Liverpool School of Tropical Medicine, |
| <b>Primary Subject Heading</b> : | Global health                                                                                                                                                                                                                                       |
| Secondary Subject Heading:       | Public health                                                                                                                                                                                                                                       |
| Keywords:                        | PUBLIC HEALTH, DIABETES & ENDOCRINOLOGY, Hypertension <<br>CARDIOLOGY, HIV & AIDS < INFECTIOUS DISEASES                                                                                                                                             |
|                                  |                                                                                                                                                                                                                                                     |

SCHOLARONE™  
Manuscripts

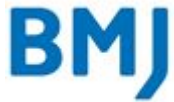

I, the Submitting Author has the right to grant and does grant on behalf of all authors of the Work (as defined in the below author licence), an exclusive licence and/or a non-exclusive licence for contributions from authors who are: i) UK Crown employees; ii) where BMJ has agreed a CC-BY licence shall apply, and/or iii) in accordance with the terms applicable for US Federal Government officers or employees acting as part of their official duties; on a worldwide, perpetual, irrevocable, royalty-free basis to BMJ Publishing Group Ltd ("BMJ") its licensees and where the relevant Journal is co-owned by BMJ to the co-owners of the Journal, to publish the Work in this journal and any other BMJ products and to exploit all rights, as set out in our [licence](#).

The Submitting Author accepts and understands that any supply made under these terms is made by BMJ to the Submitting Author unless you are acting as an employee on behalf of your employer or a postgraduate student of an affiliated institution which is paying any applicable article publishing charge ("APC") for Open Access articles. Where the Submitting Author wishes to make the Work available on an Open Access basis (and intends to pay the relevant APC), the terms of reuse of such Open Access shall be governed by a Creative Commons licence – details of these licences and which [Creative Commons](#) licence will apply to this Work are set out in our licence referred to above.

Other than as permitted in any relevant BMJ Author's Self Archiving Policies, I confirm this Work has not been accepted for publication elsewhere, is not being considered for publication elsewhere and does not duplicate material already published. I confirm all authors consent to publication of this Work and authorise the granting of this licence.



## Integrating HIV, diabetes and hypertension services in Africa: study protocol for a cluster-randomised trial in Tanzania and Uganda.

Sayoki Godfrey Mfinanga <sup>1,2</sup>\*, Moffat J Nyirenda <sup>3\*</sup>, Gerald Mutungi <sup>4</sup>, Janneth Mghamba <sup>5</sup>, Sarah Maongezi <sup>6</sup>, Joshua Musinguzi <sup>7</sup>, Joseph Okebe <sup>8</sup>, Sokoine Kivuyo <sup>1</sup>, Josephine Birungi <sup>3</sup>, Erik van Widenfelt <sup>8</sup>, Marie Claire van Hout <sup>9</sup>, Max Bachmann <sup>10</sup>, Anupam Garrib <sup>8</sup>, Dominic Bukonya <sup>3</sup>, Walter Cullen <sup>11</sup>, Jeffrey Victor Lazarus <sup>12</sup>, Louis Wihelmus Niessen <sup>8</sup>, Anne Katahoire <sup>13</sup>, Elizabeth Henry Shayo <sup>1</sup>, Ivan Namakoola <sup>3</sup>, Kaushik Ramaiya <sup>14</sup>, Duolao Wang <sup>8</sup>, LE Cuevas <sup>8</sup>, Bernard M Etukoit <sup>15</sup>, Janet Lutale <sup>2</sup>, Shimwela Meshack <sup>16</sup>, Kenneth Mugisha <sup>15</sup>, Geoff Gill <sup>8</sup>, Nelson Sewankambo <sup>13+</sup>, Peter Smith <sup>17+</sup> Shabbar Jaffar <sup>8+</sup>

\* contributed equally

+ contributed equally

Author for correspondence, Prof Shabbar Jaffar, [shabbar.jaffar@lstmed.ac.uk](mailto:shabbar.jaffar@lstmed.ac.uk)

1. National Institutes for Medical Research, Dar es Salaam, Tanzania
2. Muhimbili University of Health and Allied Sciences, Dar es Salaam, Tanzania
3. MRC/UVRI & LSHTM Uganda Research Unit, Entebbe, Uganda
4. Non-Communicable Diseases Control Programme, Ministry of Health, Uganda
5. Directors Office, Ministry of Health, Community Development, Gender, Elderly and Children, Tanzania.
6. Non-Communicable Diseases Control Programme, Ministry of Health, Ministry of Health, Community Development, Gender, Elderly and Children, Tanzania.
7. AIDS Control Programme, Ministry of Health, Uganda
8. Liverpool School of Tropical Medicine, Pembroke Place, Liverpool, L3 5QA
9. Public Health Institute, Liverpool John Moores University, Liverpool.
10. Norwich Medical School, Faculty of Medicine and Health Sciences, University of East Anglia, Norwich, UK
11. School of Medicine, University College Dublin, Dublin, Ireland
12. Barcelona Institute for Global Health (ISGlobal), Hospital Clinic, University of Barcelona, Instituto de Salud Global de Barcelona, Barcelona, Spain
13. Makerere University College of Health Sciences, Kampala, Uganda
14. Hindu Mandal Hospital, Dar es Salaam, Tanzania
15. The AIDS Support Organisation, Kampala, Uganda
16. Amana Regional Referral Hospital, Dar es Salaam, Tanzania
17. MRC International Epidemiology and Statistics Group, London School of Hygiene & Tropical Medicine, Keppel Street, London WC1E 7HT

## ABSTRACT

### Introduction

HIV programmes in sub Saharan Africa are well-funded but programmes for diabetes and hypertension are weak with only a small proportion of patients in regular care. Health care provision is organised from stand-alone clinics. In this cluster-randomised trial, we are evaluating a concept of integrated care for people with HIV-infection, diabetes or hypertension from a single point of care.

### Methods and Analysis

32 primary care health facilities in Dar es Salaam and Kampala regions were randomised to either integrated or standard vertical care. In the integrated care arm, services are organised from a single clinic where patients with either HIV-infection, diabetes, or hypertension are managed by the same clinical and counselling teams. They use the same pharmacy and laboratory and have the same style of patient records. Standard care involves separate pathways, i.e. separate clinics, waiting and counselling areas, a separate pharmacy and separate medical records.

The trial has 2 primary endpoints: retention in care of people with hypertension or diabetes and plasma viral load suppression. Recruitment is expected to take 6 months and follow-up is for 12 months.

With 100 participants enrolled in each facility with diabetes or hypertension, the trial will provide 90% power to detect an absolute difference in retention of 15% between the study arms (at the 5% two-sided significance level). If 100 participants with HIV-infection are also enrolled in each facility, we will have 90% power to show non-inferiority in virological suppression to a delta=10% margin (i.e. that the upper limit of the one-sided 95% confidence interval of the difference between the two arms will not exceed 10%). To allow for loss to follow-up, the trial will enrol over 220 persons per facility.

This is the only trial of its kind evaluating the concept of a single integrated clinic for chronic conditions in Africa

### Ethics and Dissemination

The protocol has been approved by ethics committee of The AIDS Support Organisation, National Institute of Medical Research and the Liverpool School of Tropical Medicine.

Dissemination of findings will be done through journal publications and meetings involving study participants, health care providers and other stakeholders.

Trial registration: ISRCTN43896688

### Strengths of this trial

- This is the largest trial of its kind with replication in over 30 health facilities and 2 countries.
- It was designed, implemented and is being monitored in partnership with patient representatives, health care providers, policy makers and other stakeholders.
- The trial is measuring objective markers of effectiveness and is multidisciplinary.

### Limitations of this trial

- The trial has a relatively short follow-up of 12 months and cannot estimate effect against mortality or other longer-term outcomes.

- The trial cannot be blinded – both health care providers and patients know the intervention being delivered at each health facility.

## INTRODUCTION

In sub Saharan Africa, over 2 million deaths a year are attributed to hypertension and diabetes annually and this number is rising rapidly<sup>1-3</sup>. Health service provision for these conditions and for HIV, which also requires chronic life-long care, is organised separately from vertical stand-alone clinics across sub-Saharan Africa. This duplicates resources and is particularly difficult to access for the increasing number of people who have multiple conditions<sup>4</sup>.

There is little or no evidence that integration of primary care health services improves the health status of people in low or middle income countries<sup>5,6</sup>. Studies from sub-Saharan Africa evaluating complete integration – i.e. a single clinic that can manage multiple chronic conditions - for people living with any one or more chronic conditions are particularly scarce<sup>7</sup>. We found one study from a Mediciens Sans Frontieres - supported health facility serving an informal settlement in Nairobi, Kenya. Patients with either HIV-infection or non-communicable conditions (mostly hypertension) were seen together for basic monitoring and provision of drugs. However, the study size was just 1432 patients, it was retrospective and done at a single site<sup>8</sup>. Limited evidence is also available from South Africa<sup>9,10</sup>, but the health system here is much stronger and findings difficult to generalise to other parts of sub Saharan Africa.

Given the limited evidence, we first conducted a large preliminary study to evaluate the acceptability and feasibility of integration of services for HIV, diabetes and hypertension in Tanzania and Uganda. We enrolled 2273 participants in a cohort study to receive integrated care from 10 health facilities and followed the cohort for between 6-12 months. Retention was high and analysis suggested that the integrated model could be highly cost-effective<sup>11</sup>. However, the study did not have a comparative group. Here we present the plans for a large pragmatic cluster-randomised trial that follows the initial study and is designed to inform policy.

## METHODS

The INTE-AFRICA trial is a pragmatic parallel arm cluster randomised-controlled trial, comparing integrated health services for HIV-infection diabetes and hypertension with a standard care approach (i.e. stand-alone care) in Tanzania and in Uganda. Health facilities have been randomised to either integrated care or current standard care. Enrolment began on 30<sup>th</sup> June 2020 and finished in April 2021. Follow-up will continue for 12 months. Figure 1 shows the trial schema. Procedures for enrolment and the management of participants are identical in the two arms. The research team sees the participants at baseline, 6 months and 12 months and each time they self-refer (e.g. attend because they are sick) for data collection.

The integrated care arm comprises:

- A single clinic where patients with either HIV-infection, diabetes or hypertension are managed. Patients can have one or more of these conditions.

- There is one area where patients register and wait.
- They are managed by the same clinicians, nurses, counsellors and other staff.
- There is one pharmacy where the dispensing of medicines is integrated
- Patient records are the same for all patients
- Laboratory samples are managed and tested in the same laboratory service where possible.
- Patients usually attend health facilities 3-monthly for routine appointments.

The standard vertical care provided in Tanzania and Uganda is the control arm and comprises:

- Vertical care in separate clinics for HIV-infection, diabetes and hypertension, (i.e. standard current practice).
- HIV services have separate waiting areas and separate consultation rooms, a separate dedicated pharmacy, separate medical records, and laboratory samples are managed separately from those for diabetes and hypertension services.
- Patients with HIV usually attend for routine appointments 3-monthly but those with diabetes or hypertension attend their clinics monthly.
- Diabetes and hypertension services continue as they are. Patients with these conditions are usually managed in separate clinics and they use the general hospital pharmacy. These patients will usually attend health facilities monthly for routine appointments.

Thousands of patients are receiving care for HIV-infection, diabetes and hypertension at each health facility but for the sample size requirements, we only need to enrol a subset of participants at each facility. Therefore, in those facilities randomised to integration, stand-alone “integrated clinics” have been set-up. In some facilities, these run on a day when the separate standalone HIV, diabetes and hypertension clinics are not operating. In others, it is run in separate rooms away from the main vertical standalone clinics. In the standard care, participants are enrolled into the research study and continue to receive standard care.

We have attempted to bring clinical staff to a common level of understanding of the management of HIV-infection, diabetes and hypertension in both the arms of the trial. Thus, government clinical and counselling staff have had classroom training on the management of HIV-infection, diabetes and hypertension for 1-2 days. Both health care and all research staff have also received training on the protocol, also for one day.

Thereafter, staff received on-the-job training for a period of one month. Within the integrated care clinics, staff specialised in one condition supported staff new to managing the other 2 conditions. For example, the doctors who have traditionally managed patients with HIV-infection periodically observe staff from diabetes and hypertension clinics treating HIV-infected patients. They provide constructive feedback and support.

1  
2  
3 Staff in the vertical standalone clinics also receive on-the-job training. Those managing the single  
4 conditions are observed at least once every week for 4 weeks. They receive constructive feedback  
5 and support.  
6

### 7 **Study design and setting.**

8 INTE-AFRICA comprises 32 health facilities that have been randomised in the two countries – 16 to  
9 integrated care and 16 to the standard care (control arm). Seventeen facilities are in Uganda and 15  
10 in Tanzania. Health policies in both countries support integrated management for chronic conditions  
11 but clinical practice involves vertical health care delivery for HIV, diabetes and hypertension, with  
12 clinics for these conditions typically run on different days of the week in most health facilities <sup>12</sup>. As  
13 in most of sub-Saharan Africa, shortages in medicines for diabetes and hypertension are common <sup>13-</sup>  
14 <sup>15</sup>. HIV services are organised in separate areas of the health facilities, with separate clinical and  
15 counselling staff, separate medicines procurement, and separate medical records <sup>16</sup>.  
16  
17

18  
19 The trial is being done in close to normal health service conditions, with government health care  
20 staff managing patients <sup>17</sup>. Thus, health care provision, including setting up of the integrated care  
21 clinics, has been done by health services, with limited support from the research team. The research  
22 team organised basic training in the management of patients with chronic conditions, as mentioned  
23 above, and supported health facilities to strengthen the provision of medicines supply for  
24 hypertension and diabetes <sup>18</sup>. In Uganda, in a few health facilities in the region, groups of  
25 participants had formed 'clubs' whereby each patient contributes money into a single fund and the  
26 Club uses it to purchase drugs when government supplies are limited. The research team supported  
27 the health facility managers to kick-start these Clubs in each facility participating in the trial for the  
28 purchase of medicines for diabetes and hypertension. The health facility managers gathered patients  
29 together to discuss procedures, the setting up of a common bank account, and agreeing a drug  
30 procurement and dispensing system. Each patient contributed about £5 per month. The bulk  
31 purchasing led to a 50-60% reduction in drug costs compared with pharmacy prices. The drugs were  
32 delivered to the facility pharmacy, which distributed them to participants. This was done by the  
33 pharmacist and overseen by one of the patient volunteers. To support this effort, the research team  
34 provided buffer drug supplies for 2 months when a facility ran short to enable the patients' central  
35 fund to grow and after this period, the club was self-sustaining.  
36  
37  
38

39 In Tanzania, some patients are on insurance schemes and so had a reliable medicines supply. Others  
40 were expected to pay for their medicines if they could afford this. The health facilities have an  
41 established protocol for evaluating patients who have no insurance and are not able to pay. The  
42 project provided a buffer to the facilities for the few patients that are not able to purchase the  
43 drugs.  
44

45  
46 Research data collection is minimal and done mostly by trained researchers while patients wait for  
47 consultations. For our co-primary endpoint of plasma viral load suppression, samples are taken by  
48 health care staff and tested in government laboratories. Where needed, the research programme  
49 pays for the tests and the data are used by both the research team and the health care teams for  
50 patient management.  
51

52 INTE-AFRICA is being conducted in medium-large sized health facilities that focus on offering  
53 ambulatory care. All of the facilities are run by physicians or medical officers, supported by part-  
54 qualified physicians (clinical officers or assistant medical officers). The facilities are located in largely  
55 urban settings in Dar es Salaam in Tanzania and Kampala region in Uganda. They were selected  
56 according to the following criteria:  
57

### 58 Inclusion criteria

59  
60

- Provides dedicated care for diabetes and HIV-infection in separate clinics.
- Has a minimum of n=100 patients in care with diabetes.

#### Exclusion criteria

- Provide specialist referral care
- Does not provide diabetes services

We chose to enrol facilities that have dedicated separate clinics for HIV-infection and diabetes. We have not specified hypertension in our inclusion criteria. In the health facilities where we are working, hypertension clinics are sometimes standalone and sometimes integrated with diabetes clinics, depending on the volume of patients. Since these health facilities currently provide care separately for HIV-infection and diabetes/hypertension, integration will involve the greatest change for the health facility and therefore the greatest advance in knowledge. Diabetes care is fragmented and screening to identify people with diabetes is limited. We had a minimum of 100 people with diabetes as a requirement since some clinics manage few patients with diabetes.

We are not intervening in large referral hospitals that offer specialised care. They act as referral centres. We are also not enrolling at smaller health facilities that do not offer diabetes services as such facilities could not act as effective control clinics for vertical care.

Government health facilities fulfilling these criteria are large health centres (health centre IVs and a few health centre IIIs) in Uganda. In Tanzania, the comparable centres are the smaller district and municipal hospitals, and the larger health centres.

In both Tanzania and Uganda, the not-for-profit non-governmental organisations (NGO) are responsible for a substantial amount of health care delivery, which is organised in accordance with national guidelines. They are also major players in training and strengthening health care provision in government health facilities. We are recruiting a small number of NGO-run health facilities that are similar to the government health facilities providing dedicated primary health care.

We chose the regions, based on ease of access for the research team. We then visited the large facilities that fulfilled the criteria above. We omitted a small number that were inaccessible.

In the selection of study participants, we kept the criteria minimal so as to maximise generalisability of findings.

#### Inclusion criteria

- Adult, 18 years or older.
- Confirmed HIV-infection, diabetes or hypertension
- Living within the catchment population of the health facility
- Likely to remain in the catchment population for 6 months
- Willing to provide written informed consent.

#### Exclusion criteria

- Sick, requiring immediate hospital care

1  
2  
3  
4  
5 We know that at each of the study health facilities, the numbers of patients receiving diabetes care  
6 or those with multiple conditions are limited and so patients with these conditions are being  
7 enrolled consecutively.  
8  
9

10 The health facilities have a high volume of patients with HIV-infection and with hypertension. Some  
11 health facilities do not offer appointments and so there is no way of knowing who will present the  
12 next day. In larger health facilities, appointments are given out in 3-4 blocks during the day so as to  
13 spread the patient load.  
14

15 Selection of patients using simple random sampling minimises bias but is difficult to achieve.  
16 Therefore, we are conducting systematic sampling to enrol patients with HIV-infection or  
17 hypertension – that is taking every 5<sup>th</sup> or 10<sup>th</sup> patient consecutively in order of their attendance at  
18 the health facility, depending on the patient load. If the study team are late arriving at the facility, or  
19 if a patient refuses to join the study, then they maintain the systematic sequence and start at the  
20 next sequence number (i.e. offer enrolment to the next 5<sup>th</sup> or next 10<sup>th</sup> patient).  
21  
22

23 In the HIV or hypertension clinics, patients' details are entered onto a clinic register when they arrive  
24 and research staff use the register to determine the first patient for enrolment, second patient and  
25 so on.  
26  
27

28 Sampled patients are then invited to participate in the trial following written informed consent.  
29

### 30 **RANDOMISATION:**

31 The study is cluster-randomised since the intervention is delivered at a clinic level.  
32  
33

34 There is considerable variation in infrastructure and service provision between health facilities.  
35 Therefore, to ensure balance between the intervention and control arms, we stratified the  
36 randomisation. The strata comprised:  
37

- 38 A. District hospitals, or large health centres:
- 39 B. Health centres or large dispensaries
- 40 C. Not-for-profit health facilities:
- 41

42 Within each stratum, we randomised facilities in a 1:1 ratio to either integrated care or standard  
43 care using a permuted block randomisation method generated by SAS® PROC PLAN.  
44  
45

46 We considered changing the mode of care entirely for all patients at each clinic to either integrated  
47 or vertical care, depending on the randomisation. This would have replicated real life health care  
48 delivery. However, it would have represented a major change for the health services, without the  
49 evidence to support such a move. It would also have meant that those people who were currently  
50 receiving vertical care and did not wish to change, would not have had the choice to continue.  
51 Therefore, although randomised by clinic, we are enrolling only a small proportion of the very many  
52 patients attending health services at the clinic. In the clinics randomised to provide integrated care,  
53 they are the sole point of integration in that facility for HIV-infection, diabetes and hypertension as  
54 integrated services are not provided anywhere else in either country.  
55  
56

### 57 **PRIMARY ENDPOINTS:**

58 The study has 2 co-primary endpoints, which will be ascertained over a 12-month follow-up:  
59  
60

- **Retention in care** for patients on diabetes and hypertension management. This is measured as the proportion of people alive and in care at 12 months of follow-up.
- **Plasma viral load suppression** among persons HIV-infected. This is defined as plasma viral load less than 1000 copies per ml.

We will define a participant as being retained in care if he/she has attended clinic for their routine 6-month assessment or anytime after that and in the subsequent 6-months (i.e. up to month 12), that he/she has not been declared lost to follow-up, has not withdrawn and has not died.

Participants who have transferred away for their care will be contacted by phone. In many cases, this will be because of referral for specialist care. If they are still in care in the places that they transferred out to, then they will be assumed to be retained for the purposes of the primary analysis.

Viral suppression will be defined as a viral load of <400 copies per ml (or reported as undetectable viral load). Any viral load measurements taken at or after 6 months after enrolment in the trial will be used in this endpoint analysis.

*Rationale:* Retention in care is fundamental to disease control and has been very low for people with diabetes or hypertension in African settings, even where health care and medicines are provided for free. It is also a common indicator to both conditions.

We considered blood pressure and glycaemia control as primary endpoints but decided on retention as that is the immediate aim of our intervention. Once African health services can achieve good retention, the next stage of the research will be to assess impact on clinical indicators. At present, there are few reliable background data from Africa on blood pressure and glycaemia control achieved by populations able to access treatments. However, in high-income countries, only about 1 in 4 persons with known hypertension and 1 in 2 persons with known diabetes achieve adequate blood pressure and glycaemia control respectively, and control is poorer in low-resource settings<sup>19-22</sup>.

We also considered a disease-based composite outcome such as either a stroke, myocardial infarction, or all cause-mortality, but this would need many years of follow-up. Also, given the poor retention in care, measuring disease incidence is fraught with bias. For these reasons, we chose retention as one of the primary endpoints.

The trial will also test whether there is an adverse effect of integrated services on HIV outcomes. In other words, does integration lead to poorer HIV viral suppression as compared with standard vertical care? To answer this question, HIV viral load was selected as a co-primary endpoint.

Secondary endpoints will include control of blood pressure and glycaemia, cost of illness and health care, incidence of clinical events including hospital admissions and deaths and plasma viral load >100 copies per ml. Definitions of the control of blood pressure will include achieving a blood pressure <140/90 mm Hg and of diabetes as achieving fasting blood glucose <7mg/dl. The indicators will also be analysed on a continuum.

Although the study has two co-primary outcomes, they are being measured in different populations, one among people with hypertension or diabetes and the other in people with HIV-infection. The plasma viral load is also a safety outcome in that we wish test whether integration does harm to



outcomes of people with HIV-infection. Therefore, we will not adjust the final analyses for multiplicity.

### Sample size considerations

*i). Retention in care endpoint.* We assumed that with the training and improved procedures, retention in care for persons with diabetes and hypertension would improve under current standard care – probably to a figure around 60 - 70%. As a comparison, for HIV-infection, this figure was around 70-80% prior to about 2006 and is generally around 90% today<sup>23</sup>.

We hypothesised that in the intervention arm, integration would lead to further improved retention rates compared with the standard vertical care for diabetes and hypertension. Thus, this endpoint was powered on an assumption of superiority.

The sample size calculation must take clustering at health facility into account (i.e. the variation between health facilities as well as variation between patients). We have done this for different values of the intra-class correlation coefficient. This is a measure of the variation between health facilities, which we can minimise between arms by stratification. In many trials, the intra-class correlation coefficient is assumed to be 0.05 but we were conservative in accepting a higher level of variation of 0.06<sup>24,25</sup>.

The calculations show that for hypertension and diabetes, if the retention in the standard vertical care arm is 60% at 12 months, then 32 facilities (16 randomised to integration and 16 to standard vertical care), with 100 patients studied in each facility, will provide 90% power to detect an absolute difference of 15% between the two study arms (i.e. a retention of 60% versus 75% respectively in the standard care and intervention arms) (Table 1). If the variation between health facilities turns out to be higher (i.e. intra-class coefficient is 0.07, power will still exceed 80%). If the retention rate in the control arm is 70%, then power to detect differences will be even higher.

We will enrol 110 patients in each of the 32 facilities to allow for a 10% refusal rate. This refusal rate is conservative as in previous large studies in these settings, our refusal rate has been close to zero<sup>26</sup>. The group of 110 patients in each facility will be a mix of persons with either diabetes or hypertension or both conditions. The total number of patients within this randomised evaluation will be 3,520.

**Table 1. Total number of facilities needed in both arms to demonstrate absolute differences of between 10% to 20% for different values of variation between health facilities (intra-class coefficient of variation) and of numbers of patients needed in each facility. The calculations assume 90% power and a 2-sided significance level of 5%.**

| Intra-class coefficient of variation | Number of patients per facility | Proportion retained in care in the integrated care arm |     |     |
|--------------------------------------|---------------------------------|--------------------------------------------------------|-----|-----|
|                                      |                                 | 70%                                                    | 75% | 80% |
| 0.05                                 | 50                              | 74                                                     | 32  | 18  |
| 0.06                                 | 50                              | 84                                                     | 36  | 20  |
| 0.07                                 | 50                              | 94                                                     | 40  | 22  |
| 0.05                                 | 100                             | 64                                                     | 28  | 16  |

|      |     |    |    |    |
|------|-----|----|----|----|
| 0.06 | 100 | 74 | 32 | 18 |
| 0.07 | 100 | 86 | 36 | 20 |
|      |     |    |    |    |
| 0.05 | 200 | 60 | 26 | 14 |
| 0.06 | 200 | 70 | 30 | 16 |
| 0.07 | 200 | 80 | 34 | 20 |
|      |     |    |    |    |

ii). *HIV plasma viral load endpoint*. The sample size for the HIV component is calculated to show non-inferiority between the integration and the standard vertical care arms. We will enrol the same number of persons with HIV-infection (3,520 comprising 110 patients in each of 32 facilities) as the number with hypertension or diabetes in the cluster-randomised trial.

The numbers of HIV-infected people with known diabetes, hypertension or both is likely to be small as testing is limited across Africa. We will enrol all patients with known multimorbidity to add to the 3,520 HIV-infected persons and 3,520 with diabetes or hypertension.

In terms of virologic suppression, if we assume that this is 85% at 12 months in the standard care arm, we will have 90% power to show non-inferiority between the 2 arms to a  $\Delta=10\%$  margin (i.e. that the upper limit of the one-sided 95% confidence interval of the difference between the standard care and intervention arms will not exceed 10%). This also assumes an intra-class coefficient of variation of 0.06 and 1-sided 95% confidence interval.

### Health economics endpoints

A sub-study on costs is nested in the trial. Its aim is to provide evidence on the costs associated with accessing care for study participants and the costs of delivering care from the health providers perspective.

The economic evaluation will be based on the clinical and operational outcome parameters to define the economic effectiveness outcomes. The primary outcomes will be the incremental cost per additional person retained in the programme and the incremental cost per additional person virologically suppressed. Other outcomes will be the health care cost per patient category per year in integrated care and standard care, the average health care costs per additional patient treated and the change in the average health care costs / societal cost per additional patient with a controlled condition.

Given that costs and benefits of integrated care services may extend beyond the follow up period and that these chronic conditions have lifelong consequences, we will construct an individual-based microsimulation model to estimate the long-term and lifelong cost-effectiveness of different methods of care for patients with different conditions and explore the cost-effectiveness of future scale up of these health care approaches.

### Statistical analysis

The primary indicators will be compared between the intervention arm and standard care, while controlling for possible confounders, defined *a priori*. General estimating equation models will be used for the analysis to take account of clustering of data within health facilities.

1  
2  
3 The primary measure of effectiveness for the primary outcomes will be absolute risk differences and  
4 risk ratios. Time to event analysis – i.e. time to loss from care – will also be conducted. We will not  
5 adjust for multiple comparisons. Although we have 2 co-primary endpoints, they are in different  
6 populations.  
7

8  
9 An intention-to-treat analysis strategy will be used for the primary analysis. Every effort will be made  
10 to minimise missing outcome data at each visit. Sensitivity analyses will be conducted to assess the  
11 robustness of the missing data assumption made in the primary analysis. Detailed statistical analyses  
12 will be described in the statistical analysis plan.  
13  
14

### 15 **Process Evaluation**

16  
17 Concurrent process evaluation is being done alongside the implementation of INTE-AFRICA to  
18 understand the context, description of the intervention and its causal assumptions, implementation,  
19 mechanisms of impact and outcomes and document stakeholders experiences, attitudes, and  
20 practices during implementation, and to understand the impact of structural and contextual factors  
21 (macro/meso/micro) on implementation<sup>27</sup>. This is described elsewhere<sup>4</sup>.  
22  
23

### 24 **Data management.**

25  
26 The study is run in accordance with good clinical practice. This involves regular monitoring of  
27 procedures and checking of data collected. A custom electronic database has been designed for the  
28 trial. Staff received training on the electronic database as well as on how to report issues and make  
29 suggestions. Trial data are collected and validated electronically in real-time with built in data-type  
30 and logic checks with the patient at the point of care. The real-time validation logic is custom to the  
31 protocol and references new and existing patient data for immediate feedback to the user. Data  
32 modifications are tracked in a comprehensive electronic audit trail so as to not obscure changes.  
33 Changes to the source code of the electronic database are tracked and versioned. The current  
34 software version is stamped on each record as it is modified.  
35  
36  
37

38 Data may be viewed, created, modified, deleted or exported by delegated persons according to the  
39 access roles associated with their personal accounts. The sponsor and other relevant parties may be  
40 given access to data separately with suitable notice. Security of data is ensured using authentication  
41 and encryption to render subject identity and personal health information unusable, unreadable and  
42 indecipherable to unauthorised individuals. The application and database layers use a combination  
43 of hashing and field-level encryption for sensitive and personal data. Study data are not stored on  
44 devices in the field.  
45  
46

### 47 **Ethics and Dissemination**

48  
49 The protocol has been approved by ethics committee of The AIDS Support Organisation, Uganda  
50 (reference number TASOREC/090/19-UG-REC-009), National Institute of Medical Research,  
51 Tanzania (reference number NIMR/HQ/R.8a/Vol. IX/3394, 23/03/2020) and the Liverpool  
52 School of Tropical Medicine, UK (reference number 19-100, 02/07/2020).  
53  
54

55 The findings of the study will be shared with policy makers and senior programme  
56 managers, with civil societies (including the East African NCDs Alliance, the Tanzania  
57 Diabetes Association and others), with patient groups and with the participants. The  
58 findings will also be published in peer-reviewed journals.  
59  
60

## Patient and Public involvement

### How was the development of the research question and outcome measures informed by patients' priorities, experience, and preferences?

We conducted a large pilot study. Integrated care clinics for patients living HIV-infection, diabetes or hypertension were set up in 10 health facilities in Tanzania and Uganda. Over 2000 patients with one or more of these chronic conditions were followed up for 6-12 months. Acceptance was high and retention in care at the study end exceeded 80%. Integrated care was particularly welcomed by patients who had more than one condition and who would otherwise visit the health facility multiple times.

Before the pilot study started, we set up steering committees in both Tanzania and Uganda, which comprised researchers, policy makers and had patient representatives. We held investigator meetings involving all of the partners. These included a patient representative and at the last meeting, held in December 2019 in Uganda (prior to the start of this trial), one of the patient representatives gave a talk on why integrated management was important to him and other patients.

### How did you involve patients in the design of this study?

Patient representatives attended our planning meetings and contributed to the design of the study and other aspects of the research, such as its implementation.

### Are patients involved in the recruitment to and conduct of the study?

Patient representatives remain on the steering committees and are invited to the large investigator meetings. The steering committees meet every 3-6 months. At these patients, patient representatives provide input into the recruitment and conduct of the study.

### How will the results be disseminated to study participants?

This will be done through information leaflets, written for study participants. We will distribute these to all study participants. We will also present the findings to the steering committees, which are attended by patient representatives, and publish the findings in a journal.

**For randomised controlled trials, was the burden of the intervention assessed by patients themselves?** The patients were fully informed about the intervention. The intervention was designed to reduce the burden of visits for patients.

### Governance and oversight.

As mentioned above, each partner country has a steering committee. There is also a single international steering committee, which is chaired by and has majority participation of independent researchers, and an independent data and safety monitoring committee. The composition and charter of the independent data and safety monitoring committee is available on request.

The trial Sponsor is the Liverpool School of Tropical Medicine ([lstmgov@lstmed.ac.uk](mailto:lstmgov@lstmed.ac.uk)).

## DISCUSSION.

In this trial, we are testing the concept of a single chronic care clinic where people living with any one or more of the target conditions – HIV-infection, diabetes or hypertension – may come for health services and care. Very few settings in Africa have even attempted screening of people with HIV-infection for chronic conditions, despite their high prevalence. To our knowledge, there have been no attempts of a fully integrated approach to these chronic conditions as being tested in this trial.

This approach is controversial on a number of fronts. The HIV programmes are well funded and have achieved high levels of coverage of antiretroviral therapy across Africa, and we are asking them to merge with much weaker programmes. Patients have traditionally been managed in standalone specialist clinics and were now asking them to move to management by generalist clinical staff, which will seem inferior to many specialists. Finally, patients with HIV-infection have always been segregated from others, and we are now asking everyone to sit together, which will be uncomfortable to some due to the stigma associated with HIV-infection.

Furthermore, the research programme cannot compensate government clinical staff for the added time that the research will take, pay for medicines or compensate patients for their time, unlike the situation in many clinical trials. For our findings to be relevant to policy-makers and other stakeholders, health care must be provided in close to normal health service conditions.

Central to the success of such research is the development of partnerships with policy makers, health care managers and providers, patient groups and community representatives. Each of these stakeholders, in particular the policy makers, are consulted at regular intervals and to date, they have given considerable time in setting the research strategy and the design and implementation of the research studies. Over time we created formal structures to ensure their voices were heard. Each country has a steering committee that includes representatives of the stakeholders, and which meets at least 3-monthly. We also have an international steering committee, which includes representation from the different partners and is dominated by independent researchers.

The study also involves researchers from multiple different disciplines, including clinical trialists and statisticians, social scientists and health economists, clinical researchers and programme managers and from both African and European institutions. Crucial to the success of the research programme to date has been that we operate on an ethos of equality and openness. This means that meetings are inclusive opportunity and support where needed is given to people to contribute. We have also invested in training in communications and unconscious bias.

We have focussed on just 3 conditions, and of the non-communicable conditions, we chose diabetes and hypertension as these are responsible for a very high disease burden and are probably more modifiable by intervention than many other chronic conditions. However, we see the test of these 3 conditions in integration as a test of proof of concept so that if integration is shown to be effective, expansion to include other conditions could be considered.

Although the trial is large, we are testing integration in a small proportion of patients attending health facilities. The evidence was simply lacking to change the health care model at each clinic. Thus, further research will be needed to estimate the effects of transforming entire clinics to integration.

We did consider other study designs to answer our question. For example, it would have been possible to recruit patients in integrated and in vertical care from the same health facilities as the

1  
2  
3 clinics often run on different days. This could have reduced costs; but risked greater contamination  
4 between the intervention and control arms and risked confusion among busy clinical staff and  
5 facility managers.  
6

7  
8 A challenge of such cluster-randomised trials is that participants and clinicians cannot be blinded,  
9 and further, that people may have their biases of which intervention should work. Thus, we have  
10 restricted evaluation to largely biomedical objective endpoints. We also train staff regularly,  
11 reminding them of the critical role of equipoise in trials.  
12  
13  
14  
15  
16

### 17 **Contributorship statement.**

18  
19 SGM, MJN, SJ wrote the original protocol, secured funding and wrote the first draft of the protocol  
20 and designed the study. SGM, GM, JMg, JMu, MCVH, MB, AG, DB, WC, LWN, EHS, KR, DW, LEC, BME,  
21 JVL, SMA, SMe, KM contributed to the design of the study and to various versions of the protocol  
22 and this paper. JL, GG, NS, PGS, AK also contributed to the study design and oversaw the study as  
23 members of the study steering committee. SK, JB, IN, co-ordinated the implementation of the study  
24 in Tanzania and Uganda with support from JO. EVW designed the data systems.  
25

26  
27 We would like to thank all of our patient representatives and focus discussion groups who have  
28 contributed to our research.  
29

### 30 **Competing interests**

31  
32 There are no competing interests for any author  
33  
34

### 35 **Funding**

36  
37 This work is funded by the EU Horizon 2020 programme, grant number 825698.  
38  
39

### 40 **REFERENCES**

- 41  
42 1. Atun R, Davies JI, Gale EAM, et al. Diabetes in sub-Saharan Africa: from clinical care to health  
43 policy. *Lancet Diabetes Endocrinol* 2017; **5**(8): 622-67.  
44 2. Collaborators GBDRF. Global, regional, and national comparative risk assessment of 79  
45 behavioural, environmental and occupational, and metabolic risks or clusters of risks, 1990-2015: a  
46 systematic analysis for the Global Burden of Disease Study 2015. *Lancet* 2016; **388**(10053): 1659-  
47 724.  
48 3. Organisation WH. World Health Organisation fact sheets. (accessed 4th April 2020).  
49 4. Van Hout MC, Bachmann M, Lazarus JV, et al. Strengthening integration of chronic care in  
50 Africa: protocol for the qualitative process evaluation of integrated HIV, diabetes and hypertension  
51 care in a cluster randomised controlled trial in Tanzania and Uganda. *BMJ Open* 2020; **10**(10):  
52 e039237.  
53 5. Dudley L, Garner P. Strategies for integrating primary health services in low- and middle-  
54 income countries at the point of delivery. *Cochrane Database Syst Rev* 2011; (7): CD003318.  
55 6. Haregu TN, Setswe G, Elliott J, Oldenburg B. Integration of HIV/AIDS and  
56 noncommunicablediseases in developing countries: rationale, policies and models. *Int J Healthcare*  
57 2015; **1**(1): 21-7.  
58  
59  
60

7. Haldane V, Legido-Quigley H, Chuah FLH, et al. Integrating cardiovascular diseases, hypertension, and diabetes with HIV services: a systematic review. *AIDS Care* 2018; **30**(1): 103-15.
8. Khabala KB, Edwards JK, Baruani B, et al. Medication Adherence Clubs: a potential solution to managing large numbers of stable patients with multiple chronic diseases in informal settlements. *Trop Med Int Health* 2015; **20**(10): 1265-70.
9. Ameh S. Evaluation of an integrated HIV and hypertension management model in rural south africa: a mixed methods approach. *Glob Health Action* 2020; **13**(1): 1750216.
10. Mahomed OH, Asmall S. Development and implementation of an integrated chronic disease model in South Africa: lessons in the management of change through improving the quality of clinical practice. *Int J Integr Care* 2015; **15**: e038.
11. Shiri T, Birungi J, Garrib A, et al. Integrated HIV, diabetes, and hypertension ambulatory health services in low-income settings – an empirical socio-economic cohort study in Tanzania and Uganda. . *BMC Med* In Press.
12. Adeyemi O, Lyons M, Njim T, et al. Integration of non-communicable disease and HIV/AIDS management: a review of healthcare policies and plans in East Africa. *BMJ Glob Health* 2021; **6**(5).
13. Bintabara D, Ngajilo D. Readiness of health facilities for the outpatient management of non-communicable diseases in a low-resource setting: an example from a facility-based cross-sectional survey in Tanzania. *BMJ Open* 2020; **10**(11): e040908.
14. Bintabara D, Shayo FK. Disparities in availability of services and prediction of the readiness of primary healthcare to manage diabetes in Tanzania. *Prim Care Diabetes* 2021; **15**(2): 365-71.
15. Katende D, Mutungi G, Baisley K, et al. Readiness of Ugandan health services for the management of outpatients with chronic diseases. *Trop Med Int Health* 2015; **20**(10): 1385-95.
16. Ford N, Ball A, Baggaley R, et al. The WHO public health approach to HIV treatment and care: looking back and looking ahead. *Lancet Infect Dis* 2018; **18**(3): e76-e86.
17. Jaffar S, Amuron B, Birungi J, et al. Integrating research into routine service delivery in an antiretroviral treatment programme: lessons learnt from a cluster randomized trial comparing strategies of HIV care in Jinja, Uganda. *Trop Med Int Health* 2008; **13**(6): 795-800.
18. Shayo E, Van Hout MC, Birungi J, et al. Ethical issues in intervention studies on the prevention and management of diabetes and hypertension in sub-Saharan Africa. *BMJ Glob Health* 2020; **5**(7).
19. (CDC) CfDCaP. Hypertension Cascade: Hypertension Prevalence, Treatment and Control Estimates Among US Adults Aged 18 Years and Older Applying the Criteria From the American College of Cardiology and American Heart Association’s 2017 Hypertension Guideline—NHANES 2013–2016. <https://millionhearts.hhs.gov/data-reports/hypertension-prevalence.html>. 2019 (accessed 12 November 2020).
20. Gill G, Gebrekidan A, English P, Wile D, Tesfaye S. Diabetic complications and glycaemic control in remote North Africa. *QJM* 2008; **101**(10): 793-8.
21. Manne-Goehler J, Geldsetzer P, Agoudavi K, et al. Health system performance for people with diabetes in 28 low- and middle-income countries: A cross-sectional study of nationally representative surveys. *PLoS Med* 2019; **16**(3): e1002751.
22. Mills KT, Bundy JD, Kelly TN, et al. Global Disparities of Hypertension Prevalence and Control: A Systematic Analysis of Population-Based Studies From 90 Countries. *Circulation* 2016; **134**(6): 441-50.
23. Rosen S, Fox MP, Gill CJ. Patient retention in antiretroviral therapy programs in sub-Saharan Africa: a systematic review. *PLoS Med* 2007; **4**(10): e298.
24. Adams G, Gulliford MC, Ukoumunne OC, Eldridge S, Chinn S, Campbell MJ. Patterns of intra-cluster correlation from primary care research to inform study design and analysis. *J Clin Epidemiol* 2004; **57**(8): 785-94.
25. Campbell MK, Fayers PM, Grimshaw JM. Determinants of the intracluster correlation coefficient in cluster randomized trials: the case of implementation research. *Clin Trials* 2005; **2**(2): 99-107.

- 1  
2  
3 26. Mfinanga S, Chanda D, Kivuyo SL, et al. Cryptococcal meningitis screening and community-  
4 based early adherence support in people with advanced HIV infection starting antiretroviral therapy  
5 in Tanzania and Zambia: an open-label, randomised controlled trial. *Lancet* 2015; **385**(9983): 2173-  
6 82.  
7  
8 27. Craig P, Dieppe P, Macintyre S, et al. Developing and evaluating complex interventions: the  
9 new Medical Research Council guidance. *BMJ* 2008; **337**: a1655.  
10  
11  
12  
13

#### 14 **Figure legends**

#### 17 **Figure 1:**

18 Trial schema. The INTE-AFRICA trial: a pragmatic parallel arm cluster-randomised trial  
19  
20  
21  
22  
23  
24  
25  
26  
27  
28  
29  
30  
31  
32  
33  
34  
35  
36  
37  
38  
39  
40  
41  
42  
43  
44  
45  
46  
47  
48  
49  
50  
51  
52  
53  
54  
55  
56  
57  
58  
59  
60





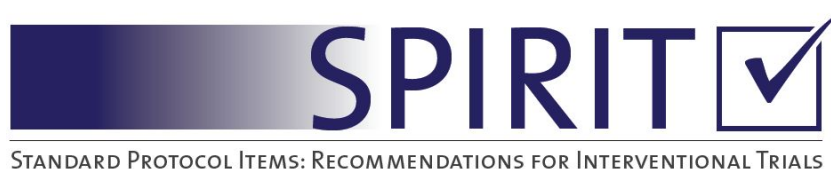

STANDARD PROTOCOL ITEMS: RECOMMENDATIONS FOR INTERVENTIONAL TRIALS

## Integrating HIV, diabetes and hypertension services in Africa: study protocol for a cluster-randomised trial in Tanzania and Uganda.

SPIRIT 2013 Checklist: Recommended items to address in a clinical trial protocol and related documents\*

| Section/item                      | Item No | Description                                                                                                                                                                                                                                                                              | Page  |
|-----------------------------------|---------|------------------------------------------------------------------------------------------------------------------------------------------------------------------------------------------------------------------------------------------------------------------------------------------|-------|
| <b>Administrative information</b> |         |                                                                                                                                                                                                                                                                                          |       |
| Title                             | 1       | Descriptive title identifying the study design, population, interventions, and, if applicable, trial acronym                                                                                                                                                                             | 1     |
| Trial registration                | 2a      | Trial identifier and registry name. If not yet registered, name of intended registry                                                                                                                                                                                                     | 2     |
|                                   | 2b      | All items from the World Health Organization Trial Registration Data Set                                                                                                                                                                                                                 |       |
| Protocol version                  | 3       | Date and version identifier                                                                                                                                                                                                                                                              | 11    |
| Funding                           | 4       | Sources and types of financial, material, and other support                                                                                                                                                                                                                              | 14    |
| Roles and responsibilities        | 5a      | Names, affiliations, and roles of protocol contributors                                                                                                                                                                                                                                  | 1, 14 |
|                                   | 5b      | Name and contact information for the trial sponsor                                                                                                                                                                                                                                       | 12    |
|                                   | 5c      | Role of study sponsor and funders, if any, in study design; collection, management, analysis, and interpretation of data; writing of the report; and the decision to submit the report for publication, including whether they will have ultimate authority over any of these activities | 14    |
|                                   | 5d      | Composition, roles, and responsibilities of the coordinating centre, steering committee, endpoint adjudication committee, data management team, and other individuals or groups overseeing the trial, if applicable (see Item 21a for data monitoring committee)                         | 12    |

### Introduction

|    |                                                           |     |                                                        |            |
|----|-----------------------------------------------------------|-----|--------------------------------------------------------|------------|
| 1  |                                                           |     |                                                        |            |
| 2  | Background and                                            | 6a  | Description of research question and justification     | 3          |
| 3  | rationale                                                 |     | for undertaking the trial, including summary of        |            |
| 4  |                                                           |     | relevant studies (published and unpublished)           |            |
| 5  |                                                           |     | examining benefits and harms for each                  |            |
| 6  |                                                           |     | intervention                                           |            |
| 7  |                                                           |     |                                                        |            |
| 8  |                                                           | 6b  | Explanation for choice of comparators                  | 3-4        |
| 9  |                                                           |     |                                                        |            |
| 10 | Objectives                                                | 7   | Specific objectives or hypotheses                      | 3          |
| 11 |                                                           |     |                                                        |            |
| 12 | Trial design                                              | 8   | Description of trial design including type of trial    | 3          |
| 13 |                                                           |     | (eg, parallel group, crossover, factorial, single      |            |
| 14 |                                                           |     | group), allocation ratio, and framework (eg,           |            |
| 15 |                                                           |     | superiority, equivalence, noninferiority,              |            |
| 16 |                                                           |     | exploratory)                                           |            |
| 17 |                                                           |     |                                                        |            |
| 18 |                                                           |     |                                                        |            |
| 19 |                                                           |     |                                                        |            |
| 20 | <b>Methods: Participants, interventions, and outcomes</b> |     |                                                        |            |
| 21 |                                                           |     |                                                        |            |
| 22 | Study setting                                             | 9   | Description of study settings (eg, community clinic,   | 5-7        |
| 23 |                                                           |     | academic hospital) and list of countries where data    |            |
| 24 |                                                           |     | will be collected. Reference to where list of study    |            |
| 25 |                                                           |     | sites can be obtained                                  |            |
| 26 |                                                           |     |                                                        |            |
| 27 | Eligibility criteria                                      | 10  | Inclusion and exclusion criteria for participants. If  | 5-7        |
| 28 |                                                           |     | applicable, eligibility criteria for study centres and |            |
| 29 |                                                           |     | individuals who will perform the interventions (eg,    |            |
| 30 |                                                           |     | surgeons, psychotherapists)                            |            |
| 31 |                                                           |     |                                                        |            |
| 32 |                                                           |     |                                                        |            |
| 33 | Interventions                                             | 11a | Interventions for each group with sufficient detail    | 4          |
| 34 |                                                           |     | to allow replication, including how and when they      |            |
| 35 |                                                           |     | will be administered                                   |            |
| 36 |                                                           |     |                                                        |            |
| 37 |                                                           | 11b | Criteria for discontinuing or modifying allocated      | Not        |
| 38 |                                                           |     | interventions for a given trial participant (eg, drug  | Applicable |
| 39 |                                                           |     | dose change in response to harms, participant          |            |
| 40 |                                                           |     | request, or improving/worsening disease)               |            |
| 41 |                                                           |     |                                                        |            |
| 42 |                                                           |     |                                                        |            |
| 43 |                                                           | 11c | Strategies to improve adherence to intervention        | 4          |
| 44 |                                                           |     | protocols, and any procedures for monitoring           |            |
| 45 |                                                           |     | adherence (eg, drug tablet return, laboratory tests)   |            |
| 46 |                                                           |     |                                                        |            |
| 47 |                                                           |     |                                                        |            |
| 48 |                                                           | 11d | Relevant concomitant care and interventions that       | Not        |
| 49 |                                                           |     | are permitted or prohibited during the trial           | Applicable |
| 50 |                                                           |     |                                                        |            |
| 51 |                                                           |     |                                                        |            |
| 52 |                                                           |     |                                                        |            |
| 53 |                                                           |     |                                                        |            |
| 54 |                                                           |     |                                                        |            |
| 55 |                                                           |     |                                                        |            |
| 56 |                                                           |     |                                                        |            |
| 57 |                                                           |     |                                                        |            |
| 58 |                                                           |     |                                                        |            |
| 59 |                                                           |     |                                                        |            |
| 60 |                                                           |     |                                                        |            |

|    |                                                                     |     |                                                                                                                                                                                                                                                                                                                                                                                |                             |
|----|---------------------------------------------------------------------|-----|--------------------------------------------------------------------------------------------------------------------------------------------------------------------------------------------------------------------------------------------------------------------------------------------------------------------------------------------------------------------------------|-----------------------------|
| 1  |                                                                     |     |                                                                                                                                                                                                                                                                                                                                                                                |                             |
| 2  | Outcomes                                                            | 12  | Primary, secondary, and other outcomes, including the specific measurement variable (eg, systolic blood pressure), analysis metric (eg, change from baseline, final value, time to event), method of aggregation (eg, median, proportion), and time point for each outcome. Explanation of the clinical relevance of chosen efficacy and harm outcomes is strongly recommended | 8-9                         |
| 3  |                                                                     |     |                                                                                                                                                                                                                                                                                                                                                                                |                             |
| 4  |                                                                     |     |                                                                                                                                                                                                                                                                                                                                                                                |                             |
| 5  |                                                                     |     |                                                                                                                                                                                                                                                                                                                                                                                |                             |
| 6  |                                                                     |     |                                                                                                                                                                                                                                                                                                                                                                                |                             |
| 7  |                                                                     |     |                                                                                                                                                                                                                                                                                                                                                                                |                             |
| 8  |                                                                     |     |                                                                                                                                                                                                                                                                                                                                                                                |                             |
| 9  |                                                                     |     |                                                                                                                                                                                                                                                                                                                                                                                |                             |
| 10 |                                                                     |     |                                                                                                                                                                                                                                                                                                                                                                                |                             |
| 11 |                                                                     |     |                                                                                                                                                                                                                                                                                                                                                                                |                             |
| 12 | Participant timeline                                                | 13  | Time schedule of enrolment, interventions (including any run-ins and washouts), assessments, and visits for participants. A schematic diagram is highly recommended (see Figure)                                                                                                                                                                                               | 3                           |
| 13 |                                                                     |     |                                                                                                                                                                                                                                                                                                                                                                                |                             |
| 14 |                                                                     |     |                                                                                                                                                                                                                                                                                                                                                                                |                             |
| 15 |                                                                     |     |                                                                                                                                                                                                                                                                                                                                                                                |                             |
| 16 |                                                                     |     |                                                                                                                                                                                                                                                                                                                                                                                |                             |
| 17 |                                                                     |     |                                                                                                                                                                                                                                                                                                                                                                                |                             |
| 18 |                                                                     |     |                                                                                                                                                                                                                                                                                                                                                                                |                             |
| 19 | Sample size                                                         | 14  | Estimated number of participants needed to achieve study objectives and how it was determined, including clinical and statistical assumptions supporting any sample size calculations                                                                                                                                                                                          | 9-10                        |
| 20 |                                                                     |     |                                                                                                                                                                                                                                                                                                                                                                                |                             |
| 21 |                                                                     |     |                                                                                                                                                                                                                                                                                                                                                                                |                             |
| 22 |                                                                     |     |                                                                                                                                                                                                                                                                                                                                                                                |                             |
| 23 |                                                                     |     |                                                                                                                                                                                                                                                                                                                                                                                |                             |
| 24 |                                                                     |     |                                                                                                                                                                                                                                                                                                                                                                                |                             |
| 25 |                                                                     |     |                                                                                                                                                                                                                                                                                                                                                                                |                             |
| 26 | Recruitment                                                         | 15  | Strategies for achieving adequate participant enrolment to reach target sample size                                                                                                                                                                                                                                                                                            | 7                           |
| 27 |                                                                     |     |                                                                                                                                                                                                                                                                                                                                                                                |                             |
| 28 |                                                                     |     |                                                                                                                                                                                                                                                                                                                                                                                |                             |
| 29 |                                                                     |     |                                                                                                                                                                                                                                                                                                                                                                                |                             |
| 30 | <b>Methods: Assignment of interventions (for controlled trials)</b> |     |                                                                                                                                                                                                                                                                                                                                                                                |                             |
| 31 | Allocation:                                                         |     |                                                                                                                                                                                                                                                                                                                                                                                |                             |
| 32 |                                                                     |     |                                                                                                                                                                                                                                                                                                                                                                                |                             |
| 33 | Sequence generation                                                 | 16a | Method of generating the allocation sequence (eg, computer-generated random numbers), and list of any factors for stratification. To reduce predictability of a random sequence, details of any planned restriction (eg, blocking) should be provided in a separate document that is unavailable to those who enrol participants or assign interventions                       | 7                           |
| 34 |                                                                     |     |                                                                                                                                                                                                                                                                                                                                                                                |                             |
| 35 |                                                                     |     |                                                                                                                                                                                                                                                                                                                                                                                |                             |
| 36 |                                                                     |     |                                                                                                                                                                                                                                                                                                                                                                                |                             |
| 37 |                                                                     |     |                                                                                                                                                                                                                                                                                                                                                                                |                             |
| 38 |                                                                     |     |                                                                                                                                                                                                                                                                                                                                                                                |                             |
| 39 |                                                                     |     |                                                                                                                                                                                                                                                                                                                                                                                |                             |
| 40 |                                                                     |     |                                                                                                                                                                                                                                                                                                                                                                                |                             |
| 41 |                                                                     |     |                                                                                                                                                                                                                                                                                                                                                                                |                             |
| 42 |                                                                     |     |                                                                                                                                                                                                                                                                                                                                                                                |                             |
| 43 |                                                                     |     |                                                                                                                                                                                                                                                                                                                                                                                |                             |
| 44 | Allocation concealment mechanism                                    | 16b | Mechanism of implementing the allocation sequence (eg, central telephone; sequentially numbered, opaque, sealed envelopes), describing any steps to conceal the sequence until interventions are assigned                                                                                                                                                                      | Not Applicable              |
| 45 |                                                                     |     |                                                                                                                                                                                                                                                                                                                                                                                |                             |
| 46 |                                                                     |     |                                                                                                                                                                                                                                                                                                                                                                                |                             |
| 47 |                                                                     |     |                                                                                                                                                                                                                                                                                                                                                                                |                             |
| 48 |                                                                     |     |                                                                                                                                                                                                                                                                                                                                                                                |                             |
| 49 |                                                                     |     |                                                                                                                                                                                                                                                                                                                                                                                |                             |
| 50 |                                                                     |     |                                                                                                                                                                                                                                                                                                                                                                                |                             |
| 51 | Implementation                                                      | 16c | Who will generate the allocation sequence, who will enrol participants, and who will assign participants to interventions                                                                                                                                                                                                                                                      | 7                           |
| 52 |                                                                     |     |                                                                                                                                                                                                                                                                                                                                                                                |                             |
| 53 |                                                                     |     |                                                                                                                                                                                                                                                                                                                                                                                |                             |
| 54 |                                                                     |     |                                                                                                                                                                                                                                                                                                                                                                                |                             |
| 55 |                                                                     |     |                                                                                                                                                                                                                                                                                                                                                                                |                             |
| 56 | Blinding (masking)                                                  | 17a | Who will be blinded after assignment to interventions (eg, trial participants, care providers, outcome assessors, data analysts), and how                                                                                                                                                                                                                                      | Not Applicable, see page 14 |
| 57 |                                                                     |     |                                                                                                                                                                                                                                                                                                                                                                                |                             |
| 58 |                                                                     |     |                                                                                                                                                                                                                                                                                                                                                                                |                             |
| 59 |                                                                     |     |                                                                                                                                                                                                                                                                                                                                                                                |                             |
| 60 |                                                                     |     |                                                                                                                                                                                                                                                                                                                                                                                |                             |

- 1  
2 17b If blinded, circumstances under which unblinding  
3 is permissible, and procedure for revealing a  
4 participant's allocated intervention during the trial  
5

6 **Methods: Data collection, management, and analysis**  
7

8 Data collection 18a Plans for assessment and collection of outcome, 5, 11  
9 methods baseline, and other trial data, including any related  
10 processes to promote data quality (eg, duplicate  
11 measurements, training of assessors) and a  
12 description of study instruments (eg,  
13 questionnaires, laboratory tests) along with their  
14 reliability and validity, if known. Reference to  
15 where data collection forms can be found, if not in  
16 the protocol  
17  
18

- 19  
20 18b Plans to promote participant retention and 4-5,8  
21 complete follow-up, including list of any outcome  
22 data to be collected for participants who  
23 discontinue or deviate from intervention protocols  
24  
25

26 Data 19 Plans for data entry, coding, security, and storage, 11  
27 management including any related processes to promote data  
28 quality (eg, double data entry; range checks for  
29 data values). Reference to where details of data  
30 management procedures can be found, if not in  
31 the protocol  
32  
33

34 Statistical 20a Statistical methods for analysing primary and 11  
35 methods secondary outcomes. Reference to where other  
36 details of the statistical analysis plan can be found,  
37 if not in the protocol  
38  
39

- 40 20b Methods for any additional analyses (eg, subgroup 11  
41 and adjusted analyses)  
42

- 43 20c Definition of analysis population relating to 11  
44 protocol non-adherence (eg, as randomised  
45 analysis), and any statistical methods to handle  
46 missing data (eg, multiple imputation)  
47  
48

49 **Methods: Monitoring**  
50

51 Data monitoring 21a Composition of data monitoring committee (DMC); 11  
52 summary of its role and reporting structure;  
53 statement of whether it is independent from the  
54 sponsor and competing interests; and reference to  
55 where further details about its charter can be  
56 found, if not in the protocol. Alternatively, an  
57 explanation of why a DMC is not needed  
58  
59  
60

|                                 |     |                                                                                                                                                                                                                                  |                |
|---------------------------------|-----|----------------------------------------------------------------------------------------------------------------------------------------------------------------------------------------------------------------------------------|----------------|
|                                 | 21b | Description of any interim analyses and stopping guidelines, including who will have access to these interim results and make the final decision to terminate the trial                                                          | Not Applicable |
| Harms                           | 22  | Plans for collecting, assessing, reporting, and managing solicited and spontaneously reported adverse events and other unintended effects of trial interventions or trial conduct                                                | 3              |
| Auditing                        | 23  | Frequency and procedures for auditing trial conduct, if any, and whether the process will be independent from investigators and the sponsor                                                                                      | 11             |
| <b>Ethics and dissemination</b> |     |                                                                                                                                                                                                                                  |                |
| Research ethics approval        | 24  | Plans for seeking research ethics committee/institutional review board (REC/IRB) approval                                                                                                                                        | 12             |
| Protocol amendments             | 25  | Plans for communicating important protocol modifications (eg, changes to eligibility criteria, outcomes, analyses) to relevant parties (eg, investigators, REC/IRBs, trial participants, trial registries, journals, regulators) | 12             |
| Consent or assent               | 26a | Who will obtain informed consent or assent from potential trial participants or authorised surrogates, and how (see Item 32)                                                                                                     | 7              |
|                                 | 26b | Additional consent provisions for collection and use of participant data and biological specimens in ancillary studies, if applicable                                                                                            | Not Applicable |
| Confidentiality                 | 27  | How personal information about potential and enrolled participants will be collected, shared, and maintained in order to protect confidentiality before, during, and after the trial                                             | 11             |
| Declaration of interests        | 28  | Financial and other competing interests for principal investigators for the overall trial and each study site                                                                                                                    | 14             |
| Access to data                  | 29  | Statement of who will have access to the final trial dataset, and disclosure of contractual agreements that limit such access for investigators                                                                                  | 11             |
| Ancillary and post-trial care   | 30  | Provisions, if any, for ancillary and post-trial care, and for compensation to those who suffer harm from trial participation                                                                                                    | Not Applicable |

|    |                   |     |                                                        |            |
|----|-------------------|-----|--------------------------------------------------------|------------|
| 1  |                   |     |                                                        |            |
| 2  | Dissemination     | 31a | Plans for investigators and sponsor to                 | 12         |
| 3  | policy            |     | communicate trial results to participants,             |            |
| 4  |                   |     | healthcare professionals, the public, and other        |            |
| 5  |                   |     | relevant groups (eg, via publication, reporting in     |            |
| 6  |                   |     | results databases, or other data sharing               |            |
| 7  |                   |     | arrangements), including any publication               |            |
| 8  |                   |     | restrictions                                           |            |
| 9  |                   |     |                                                        |            |
| 10 |                   |     |                                                        |            |
| 11 |                   | 31b | Authorship eligibility guidelines and any intended     | 14         |
| 12 |                   |     | use of professional writers                            |            |
| 13 |                   |     |                                                        |            |
| 14 |                   | 31c | Plans, if any, for granting public access to the full  | 11         |
| 15 |                   |     | protocol, participant-level dataset, and statistical   |            |
| 16 |                   |     | code                                                   |            |
| 17 |                   |     |                                                        |            |
| 18 |                   |     |                                                        |            |
| 19 | <b>Appendices</b> |     |                                                        |            |
| 20 |                   |     |                                                        |            |
| 21 | Informed consent  | 32  | Model consent form and other related                   |            |
| 22 | materials         |     | documentation given to participants and                |            |
| 23 |                   |     | authorised surrogates                                  |            |
| 24 |                   |     |                                                        |            |
| 25 |                   |     |                                                        |            |
| 26 | Biological        | 33  | Plans for collection, laboratory evaluation, and       | Not        |
| 27 | specimens         |     | storage of biological specimens for genetic or         | Applicable |
| 28 |                   |     | molecular analysis in the current trial and for future |            |
| 29 |                   |     | use in ancillary studies, if applicable                |            |
| 30 |                   |     |                                                        |            |

---

\*It is strongly recommended that this checklist be read in conjunction with the SPIRIT 2013 Explanation & Elaboration for important clarification on the items. Amendments to the protocol should be tracked and dated. The SPIRIT checklist is copyrighted by the SPIRIT Group under the Creative Commons "[Attribution-NonCommercial-NoDerivs 3.0 Unported](https://creativecommons.org/licenses/by-nc-nd/3.0/)" license.

# BMJ Open

## Integrating HIV, diabetes and hypertension services in Africa: study protocol for a cluster-randomised trial in Tanzania and Uganda.

|                               |                                                                                                                                                                                                                                                                                                                                                                                                                                                                                                                                                                                                                                                                                                                                                                                                                                                                                                                                                                                                                                                                                                                                                                                                                                                                                                                                                                                                                                                                                                                                                                                                                                                                                                                                                                                                                                                                                                                                                                                                                                                                                                                                                                                                                                                              |
|-------------------------------|--------------------------------------------------------------------------------------------------------------------------------------------------------------------------------------------------------------------------------------------------------------------------------------------------------------------------------------------------------------------------------------------------------------------------------------------------------------------------------------------------------------------------------------------------------------------------------------------------------------------------------------------------------------------------------------------------------------------------------------------------------------------------------------------------------------------------------------------------------------------------------------------------------------------------------------------------------------------------------------------------------------------------------------------------------------------------------------------------------------------------------------------------------------------------------------------------------------------------------------------------------------------------------------------------------------------------------------------------------------------------------------------------------------------------------------------------------------------------------------------------------------------------------------------------------------------------------------------------------------------------------------------------------------------------------------------------------------------------------------------------------------------------------------------------------------------------------------------------------------------------------------------------------------------------------------------------------------------------------------------------------------------------------------------------------------------------------------------------------------------------------------------------------------------------------------------------------------------------------------------------------------|
| Journal:                      | <i>BMJ Open</i>                                                                                                                                                                                                                                                                                                                                                                                                                                                                                                                                                                                                                                                                                                                                                                                                                                                                                                                                                                                                                                                                                                                                                                                                                                                                                                                                                                                                                                                                                                                                                                                                                                                                                                                                                                                                                                                                                                                                                                                                                                                                                                                                                                                                                                              |
| Manuscript ID                 | bmjopen-2020-047979.R2                                                                                                                                                                                                                                                                                                                                                                                                                                                                                                                                                                                                                                                                                                                                                                                                                                                                                                                                                                                                                                                                                                                                                                                                                                                                                                                                                                                                                                                                                                                                                                                                                                                                                                                                                                                                                                                                                                                                                                                                                                                                                                                                                                                                                                       |
| Article Type:                 | Protocol                                                                                                                                                                                                                                                                                                                                                                                                                                                                                                                                                                                                                                                                                                                                                                                                                                                                                                                                                                                                                                                                                                                                                                                                                                                                                                                                                                                                                                                                                                                                                                                                                                                                                                                                                                                                                                                                                                                                                                                                                                                                                                                                                                                                                                                     |
| Date Submitted by the Author: | 31-Aug-2021                                                                                                                                                                                                                                                                                                                                                                                                                                                                                                                                                                                                                                                                                                                                                                                                                                                                                                                                                                                                                                                                                                                                                                                                                                                                                                                                                                                                                                                                                                                                                                                                                                                                                                                                                                                                                                                                                                                                                                                                                                                                                                                                                                                                                                                  |
| Complete List of Authors:     | <p>Mfinanga, Sayoki; National Institute for Medical Research Muhimbili Research Centre, Muhimbili Medical Research Centre<br/> Nyrienda, Moffat; MRC/UVRI and LSHTM Uganda Research Unit<br/> Mutungi, Gerald; Republic of Uganda Ministry of Health, Non-Communicable Diseases Control Programme<br/> Mghamba, Janneth; Ministry of Health Community Development Gender Elderly and Children, Directors office<br/> Maongezi, Sarah; Ministry of Health Community Development Gender Elderly and Children, Non-Communicable Diseases Control Programme<br/> Musinguzi, Joshua; Republic of Uganda Ministry of Health, AIDS Control Programme<br/> Okebe, Joseph; Liverpool School of Tropical Medicine<br/> Kivuyo, Sokoine; National Institute for Medical Research<br/> Birungi, Josephine; MRC/UVRI and LSHTM Uganda Research Unit<br/> van Widenfelt, Erik; Liverpool School of Tropical Medicine<br/> Van Hout, Marie-Claire; Liverpool John Moores University, Public Health Institute<br/> Bachmann, Max; University of East Anglia, Norwich Medical School, Faculty of Medicine and Health Sciences<br/> Garrib, Anupam; Liverpool School of Tropical Medicine<br/> Bukonya, Dominic; MRC/UVRI and LSHTM Uganda Research Unit<br/> Cullen, Walter; University College Dublin School of Medicine, School of Medicine<br/> Lazarus, Jeffrey; Barcelona Institute for Global Health, Hospital Clínic, University of Barcelona<br/> Niessen, Louis; Liverpool School of Tropical Medicine, Health Economics<br/> Katahoire, Anne; Makerere University College of Health Sciences<br/> Shayo, Elizabeth; National Institute for Medical Research, Policy Analysis and Advocacy<br/> Namakoola, Ivan; MRC/UVRI and LSHTM Uganda Research Unit<br/> Ramaiya, Kaushik; Shree Hindu Mandal Hospital<br/> Wang, Duolao; Liverpool School of Tropical Medicine, Department of Clinical Sciences<br/> Cuevas, LE; Liverpool School of Tropical Medicine<br/> Etukoit, Bernard; The AIDS Support Organization<br/> Lutale, Janet; Muhimbili University of Health and Allied Sciences<br/> Meshack, Shimwela ; Amana regional referral hospital<br/> Mugisha , Kenneth; The AIDS Support Organization<br/> Gill, Geoff; Liverpool School of Tropical Medicine</p> |



|                                  |                                                                                                                                                                                                                                                     |
|----------------------------------|-----------------------------------------------------------------------------------------------------------------------------------------------------------------------------------------------------------------------------------------------------|
|                                  | Sewankambo, Nelson; Makerere University College of Health Sciences<br>Smith, Peter; London School of Hygiene & Tropical Medicine, MRC<br>International Epidemiology and Statistics Group<br>Jaffar, Shabbar; Liverpool School of Tropical Medicine, |
| <b>Primary Subject Heading</b> : | Global health                                                                                                                                                                                                                                       |
| Secondary Subject Heading:       | Public health                                                                                                                                                                                                                                       |
| Keywords:                        | PUBLIC HEALTH, DIABETES & ENDOCRINOLOGY, Hypertension <<br>CARDIOLOGY, HIV & AIDS < INFECTIOUS DISEASES                                                                                                                                             |
|                                  |                                                                                                                                                                                                                                                     |

SCHOLARONE™  
Manuscripts



I, the Submitting Author has the right to grant and does grant on behalf of all authors of the Work (as defined in the below author licence), an exclusive licence and/or a non-exclusive licence for contributions from authors who are: i) UK Crown employees; ii) where BMJ has agreed a CC-BY licence shall apply, and/or iii) in accordance with the terms applicable for US Federal Government officers or employees acting as part of their official duties; on a worldwide, perpetual, irrevocable, royalty-free basis to BMJ Publishing Group Ltd ("BMJ") its licensees and where the relevant Journal is co-owned by BMJ to the co-owners of the Journal, to publish the Work in this journal and any other BMJ products and to exploit all rights, as set out in our [licence](#).

The Submitting Author accepts and understands that any supply made under these terms is made by BMJ to the Submitting Author unless you are acting as an employee on behalf of your employer or a postgraduate student of an affiliated institution which is paying any applicable article publishing charge ("APC") for Open Access articles. Where the Submitting Author wishes to make the Work available on an Open Access basis (and intends to pay the relevant APC), the terms of reuse of such Open Access shall be governed by a Creative Commons licence – details of these licences and which [Creative Commons](#) licence will apply to this Work are set out in our licence referred to above.

Other than as permitted in any relevant BMJ Author's Self Archiving Policies, I confirm this Work has not been accepted for publication elsewhere, is not being considered for publication elsewhere and does not duplicate material already published. I confirm all authors consent to publication of this Work and authorise the granting of this licence.

## Integrating HIV, diabetes and hypertension services in Africa: study protocol for a cluster-randomised trial in Tanzania and Uganda.

Sayoki Godfrey Mfinanga <sup>1,2</sup>\*, Moffat J Nyirenda <sup>3\*</sup>, Gerald Mutungi <sup>4</sup>, Janneth Mghamba <sup>5</sup>, Sarah Maongezi <sup>6</sup>, Joshua Musinguzi <sup>7</sup>, Joseph Okebe <sup>8</sup>, Sokoine Kivuyo <sup>1</sup>, Josephine Birungi <sup>3</sup>, Erik van Widenfelt <sup>8</sup>, Marie Claire van Hout <sup>9</sup>, Max Bachmann <sup>10</sup>, Anupam Garrib <sup>8</sup>, Dominic Bukonya <sup>3</sup>, Walter Cullen <sup>11</sup>, Jeffrey Victor Lazarus <sup>12</sup>, Louis Wihelmus Niessen <sup>8</sup>, Anne Katahoire <sup>13</sup>, Elizabeth Henry Shayo <sup>1</sup>, Ivan Namakoola <sup>3</sup>, Kaushik Ramaiya <sup>14</sup>, Duolao Wang <sup>8</sup>, LE Cuevas <sup>8</sup>, Bernard M Etukoit <sup>15</sup>, Janet Lutale <sup>2</sup>, Shimwela Meshack <sup>16</sup>, Kenneth Mugisha <sup>15</sup>, Geoff Gill <sup>8</sup>, Nelson Sewankambo <sup>13+</sup>, Peter Smith <sup>17+</sup> Shabbar Jaffar <sup>8+</sup>

\* contributed equally

+ contributed equally

Author for correspondence, Prof Shabbar Jaffar, [shabbar.jaffar@lstmed.ac.uk](mailto:shabbar.jaffar@lstmed.ac.uk)

1. National Institutes for Medical Research, Dar es Salaam, Tanzania
2. Muhimbili University of Health and Allied Sciences, Dar es Salaam, Tanzania
3. MRC/UVRI & LSHTM Uganda Research Unit, Entebbe, Uganda
4. Non-Communicable Diseases Control Programme, Ministry of Health, Uganda
5. Directors Office, Ministry of Health, Community Development, Gender, Elderly and Children, Tanzania.
6. Non-Communicable Diseases Control Programme, Ministry of Health, Ministry of Health, Community Development, Gender, Elderly and Children, Tanzania.
7. AIDS Control Programme, Ministry of Health, Uganda
8. Liverpool School of Tropical Medicine, Pembroke Place, Liverpool, L3 5QA
9. Public Health Institute, Liverpool John Moores University, Liverpool.
10. Norwich Medical School, Faculty of Medicine and Health Sciences, University of East Anglia, Norwich, UK
11. School of Medicine, University College Dublin, Dublin, Ireland
12. Barcelona Institute for Global Health (ISGlobal), Hospital Clinic, University of Barcelona, Instituto de Salud Global de Barcelona, Barcelona, Spain
13. Makerere University College of Health Sciences, Kampala, Uganda
14. Hindu Mandal Hospital, Dar es Salaam, Tanzania
15. The AIDS Support Organisation, Kampala, Uganda
16. Amana Regional Referral Hospital, Dar es Salaam, Tanzania
17. MRC International Epidemiology and Statistics Group, London School of Hygiene & Tropical Medicine, Keppel Street, London WC1E 7HT

## ABSTRACT

### Introduction

HIV programmes in sub-Saharan Africa are well-funded but programmes for diabetes and hypertension are weak with only a small proportion of patients in regular care. Health care provision is organised from stand-alone clinics. In this cluster-randomised trial, we are evaluating a concept of integrated care for people with HIV-infection, diabetes or hypertension from a single point of care.

### Methods and Analysis

32 primary care health facilities in Dar es Salaam and Kampala regions were randomised to either integrated or standard vertical care. In the integrated care arm, services are organised from a single clinic where patients with either HIV-infection, diabetes, or hypertension are managed by the same clinical and counselling teams. They use the same pharmacy and laboratory and have the same style of patient records. Standard care involves separate pathways, i.e. separate clinics, waiting and counselling areas, a separate pharmacy and separate medical records.

The trial has 2 primary endpoints: retention in care of people with hypertension or diabetes and plasma viral load suppression. Recruitment is expected to take 6 months and follow-up is for 12 months.

With 100 participants enrolled in each facility with diabetes or hypertension, the trial will provide 90% power to detect an absolute difference in retention of 15% between the study arms (at the 5% two-sided significance level). If 100 participants with HIV-infection are also enrolled in each facility, we will have 90% power to show non-inferiority in virological suppression to a  $\Delta=10\%$  margin (i.e. that the upper limit of the one-sided 95% confidence interval of the difference between the two arms will not exceed 10%). To allow for loss to follow-up, the trial will enrol over 220 persons per facility.

This is the only trial of its kind evaluating the concept of a single integrated clinic for chronic conditions in Africa

### Ethics and Dissemination

The protocol has been approved by ethics committee of The AIDS Support Organisation, National Institute of Medical Research and the Liverpool School of Tropical Medicine.

Dissemination of findings will be done through journal publications and meetings involving study participants, health care providers and other stakeholders.

Trial registration: ISRCTN43896688

### Strengths of this trial

- This is the largest trial of its kind with replication in over 30 health facilities and 2 countries.
- It was designed, implemented and is being monitored in partnership with patient representatives, health care providers, policy makers and other stakeholders.
- The trial is measuring objective markers of effectiveness and is multidisciplinary.

### Limitations of this trial

- The trial has a relatively short follow-up of 12 months and cannot estimate effect against mortality or other longer-term outcomes.

- The trial cannot be blinded – both health care providers and patients know the intervention being delivered at each health facility.

## INTRODUCTION

In sub Saharan Africa, over 2 million deaths a year are attributed to hypertension and diabetes annually and this number is rising rapidly<sup>1-3</sup>. Health service provision for these conditions and for HIV, which also requires chronic life-long care, is organised separately from vertical stand-alone clinics across sub-Saharan Africa. This duplicates resources and is particularly difficult to access for the increasing number of people who have multiple conditions<sup>4</sup>.

There is little or no evidence that integration of primary care health services improves the health status of people in low or middle income countries<sup>5,6</sup>. Studies from sub-Saharan Africa evaluating complete integration – i.e. a single clinic that can manage multiple chronic conditions - for people living with any one or more chronic conditions are particularly scarce<sup>7</sup>. We found one study from a Mediciens Sans Frontieres - supported health facility serving an informal settlement in Nairobi, Kenya. Patients with either HIV-infection or non-communicable conditions (mostly hypertension) were seen together for basic monitoring and provision of drugs. However, the study size was just 1432 patients, it was retrospective and done at a single site<sup>8</sup>. Limited evidence is also available from South Africa<sup>9,10</sup>, but the health system here is much stronger and findings difficult to generalise to other parts of sub Saharan Africa.

Given the limited evidence, we first conducted a large preliminary study to evaluate the acceptability and feasibility of integration of services for HIV, diabetes and hypertension in Tanzania and Uganda. We enrolled 2273 participants in a cohort study to receive integrated care from 10 health facilities and followed the cohort for between 6-12 months. Retention was high and analysis suggested that the integrated model could be highly cost-effective<sup>11</sup>. However, the study did not have a comparative group. Here we present the plans for a large pragmatic cluster-randomised trial that follows the initial study and is designed to inform policy.

## METHODS

The INTE-AFRICA trial is a pragmatic parallel arm cluster randomised-controlled trial, comparing integrated health services for HIV-infection diabetes and hypertension with a standard care approach (i.e. stand-alone care) in Tanzania and in Uganda. Health facilities have been randomised to either integrated care or current standard care. Enrolment began on 30<sup>th</sup> June 2020 and finished in April 2021. Follow-up will continue for 12 months. Figure 1 shows the trial schema. Procedures for enrolment and the management of participants are identical in the two arms. The research team sees the participants at baseline, 6 months and 12 months and each time they self-refer (e.g. attend because they are sick) for data collection.

The integrated care arm comprises:

- A single clinic where patients with either HIV-infection, diabetes or hypertension are managed. Patients can have one or more of these conditions.

- There is one area where patients register and wait.
- They are managed by the same clinicians, nurses, counsellors and other staff.
- There is one pharmacy where the dispensing of medicines is integrated
- Patient records are the same for all patients
- Laboratory samples are managed and tested in the same laboratory service where possible.
- Patients usually attend health facilities 3-monthly for routine appointments.

The standard vertical care provided in Tanzania and Uganda is the control arm and comprises:

- Vertical care in separate clinics for HIV-infection, diabetes and hypertension, (i.e. standard current practice).
- HIV services have separate waiting areas and separate consultation rooms, a separate dedicated pharmacy, separate medical records, and laboratory samples are managed separately from those for diabetes and hypertension services.
- Patients with HIV usually attend for routine appointments 3-monthly but those with diabetes or hypertension attend their clinics monthly.
- Diabetes and hypertension services continue as they are. Patients with these conditions are usually managed in separate clinics and they use the general hospital pharmacy. These patients will usually attend health facilities monthly for routine appointments.

Thousands of patients are receiving care for HIV-infection, diabetes and hypertension at each health facility but for the sample size requirements, we only need to enrol a subset of participants at each facility. Therefore, in those facilities randomised to integration, stand-alone “integrated clinics” have been set-up. In some facilities, these run on a day when the separate standalone HIV, diabetes and hypertension clinics are not operating. In others, it is run in separate rooms away from the main vertical standalone clinics. In the standard care, participants are enrolled into the research study and continue to receive standard care.

We have attempted to bring clinical staff to a common level of understanding of the management of HIV-infection, diabetes and hypertension in both the arms of the trial. Thus, government clinical and counselling staff have had classroom training on the management of HIV-infection, diabetes and hypertension for 1-2 days. Both health care and all research staff have also received training on the protocol, also for one day.

Thereafter, staff received on-the-job training for a period of one month. Within the integrated care clinics, staff specialised in one condition supported staff new to managing the other 2 conditions. For example, the doctors who have traditionally managed patients with HIV-infection periodically observe staff from diabetes and hypertension clinics treating HIV-infected patients. They provide constructive feedback and support.

1  
2  
3 Staff in the vertical standalone clinics also receive on-the-job training. Those managing the single  
4 conditions are observed at least once every week for 4 weeks. They receive constructive feedback  
5 and support.  
6

## 7 **Patient and Public involvement**

### 8 **How was the development of the research question and outcome measures informed by patients'** 9 **priorities, experience, and preferences?**

10 We conducted a large pilot study. Integrated care clinics for patients living HIV-infection, diabetes or  
11 hypertension were set up in 10 health facilities in Tanzania and Uganda. Over 2000 patients with one  
12 or more of these chronic conditions were followed up for 6-12 months. Acceptance was high and  
13 retention in care at the study end exceeded 80%. Integrated care was particularly welcomed by  
14 patients who had more than one condition and who would otherwise visit the health facility multiple  
15 times.  
16

17 Before the pilot study started, we set up steering committees in both Tanzania and Uganda, which  
18 comprised researchers, policy makers and had patient representatives. We held investigator  
19 meetings involving all of the partners. These included a patient representative and at the last  
20 meeting, held in December 2019 in Uganda (prior to the start of this trial), one of the patient  
21 representatives gave a talk on why integrated management was important to him and other  
22 patients.  
23

### 24 **How did you involve patients in the design of this study?**

25 Patient representatives attended our planning meetings and contributed to the design of the study  
26 and other aspects of the research, such as its implementation.  
27

### 28 **Are patients involved in the recruitment to and conduct of the study?**

29 Patient representatives remain on the steering committees and are invited to the large investigator  
30 meetings. The steering committees meet every 3-6 months. At these patients, patient  
31 representatives provide input into the recruitment and conduct of the study.  
32

### 33 **How will the results be disseminated to study participants?**

34 This will be done through information leaflets, written for study participants. We will distribute  
35 these to all study participants. We will also present the findings to the steering committees, which  
36 are attended by patient representatives, and publish the findings in a journal.  
37

38 **For randomised controlled trials, was the burden of the intervention assessed by patients**  
39 **themselves?** The patients were fully informed about the intervention. The intervention was  
40 designed to reduce the burden of visits for patients.  
41

## 42 **Governance and oversight.**

43 As mentioned above, each partner country has a steering committee. There is also a single  
44 international steering committee, which is chaired by and has majority participation of independent  
45 researchers, and an independent data and safety monitoring committee. The composition and  
46 charter of the independent data and safety monitoring committee is available on request.  
47

48 The trial Sponsor is the Liverpool School of Tropical Medicine ([lstmgov@lstmed.ac.uk](mailto:lstmgov@lstmed.ac.uk)).  
49  
50  
51  
52  
53  
54  
55  
56  
57  
58  
59  
60

### Study design and setting.

INTE-AFRICA comprises 32 health facilities that have been randomised in the two countries – 16 to integrated care and 16 to the standard care (control arm). Seventeen facilities are in Uganda and 15 in Tanzania. Health policies in both countries support integrated management for chronic conditions but clinical practice involves vertical health care delivery for HIV, diabetes and hypertension, with clinics for these conditions typically run on different days of the week in most health facilities<sup>12</sup>. As in most of sub-Saharan Africa, shortages in medicines for diabetes and hypertension are common<sup>13-15</sup>. HIV services are organised in separate areas of the health facilities, with separate clinical and counselling staff, separate medicines procurement, and separate medical records<sup>16</sup>.

The trial is being done in close to normal health service conditions, with government health care staff managing patients<sup>17</sup>. Thus, health care provision, including setting up of the integrated care clinics, has been done by health services, with limited support from the research team. The research team organised basic training in the management of patients with chronic conditions, as mentioned above, and supported health facilities to strengthen the provision of medicines supply for hypertension and diabetes<sup>18</sup>. In Uganda, in a few health facilities in the region, groups of participants had formed 'clubs' whereby each patient contributes money into a single fund and the Club uses it to purchase drugs when government supplies are limited. The research team supported the health facility managers to kick-start these Clubs in each facility participating in the trial for the purchase of medicines for diabetes and hypertension. The health facility managers gathered patients together to discuss procedures, the setting up of a common bank account, and agreeing a drug procurement and dispensing system. Each patient contributed about £5 per month. The bulk purchasing led to a 50-60% reduction in drug costs compared with pharmacy prices. The drugs were delivered to the facility pharmacy, which distributed them to participants. This was done by the pharmacist and overseen by one of the patient volunteers. To support this effort, the research team provided buffer drug supplies for 2 months when a facility ran short to enable the patients' central fund to grow and after this period, the club was self-sustaining.

In Tanzania, some patients are on insurance schemes and so had a reliable medicines supply. Others were expected to pay for their medicines if they could afford this. The health facilities have an established protocol for evaluating patients who have no insurance and are not able to pay. The project provided a buffer to the facilities for the few patients that are not able to purchase the drugs.

Research data collection is minimal and done mostly by trained researchers while patients wait for consultations. For our co-primary endpoint of plasma viral load suppression, samples are taken by health care staff and tested in government laboratories. Where needed, the research programme pays for the tests and the data are used by both the research team and the health care teams for patient management.

INTE-AFRICA is being conducted in medium-large sized health facilities that focus on offering ambulatory care. All of the facilities are run by physicians or medical officers, supported by part-qualified physicians (clinical officers or assistant medical officers). The facilities are located in largely urban settings in Dar es Salaam in Tanzania and Kampala region in Uganda. They were selected according to the following criteria:

#### Inclusion criteria

- Provides dedicated care for diabetes and HIV-infection in separate clinics.
- Has a minimum of n=100 patients in care with diabetes.



### Exclusion criteria

- Provide specialist referral care
- Does not provide diabetes services

We chose to enrol facilities that have dedicated separate clinics for HIV-infection and diabetes. We have not specified hypertension in our inclusion criteria. In the health facilities where we are working, hypertension clinics are sometimes standalone and sometimes integrated with diabetes clinics, depending on the volume of patients. Since these health facilities currently provide care separately for HIV-infection and diabetes/hypertension, integration will involve the greatest change for the health facility and therefore the greatest advance in knowledge. Diabetes care is fragmented and screening to identify people with diabetes is limited. We had a minimum of 100 people with diabetes as a requirement since some clinics manage few patients with diabetes.

We are not intervening in large referral hospitals that offer specialised care. They act as referral centres. We are also not enrolling at smaller health facilities that do not offer diabetes services as such facilities could not act as effective control clinics for vertical care.

Government health facilities fulfilling these criteria are large health centres (health centre IVs and a few health centre IIIs) in Uganda. In Tanzania, the comparable centres are the smaller district and municipal hospitals, and the larger health centres.

In both Tanzania and Uganda, the not-for-profit non-governmental organisations (NGO) are responsible for a substantial amount of health care delivery, which is organised in accordance with national guidelines. They are also major players in training and strengthening health care provision in government health facilities. We are recruiting a small number of NGO-run health facilities that are similar to the government health facilities providing dedicated primary health care.

We chose the regions, based on ease of access for the research team. We then visited the large facilities that fulfilled the criteria above. We omitted a small number that were inaccessible.

In the selection of study participants, we kept the criteria as minimal so as to maximise generalisability of findings.

### Inclusion criteria

- Adult, 18 years or older.
- Confirmed HIV-infection, diabetes or hypertension
- Living within the catchment population of the health facility
- Likely to remain in the catchment population for 6 months
- Willing to provide written informed consent.

### Exclusion criteria

- Sick, requiring immediate hospital care

1  
2  
3 We know that at each of the study health facilities, the numbers of patients receiving diabetes care  
4 or those with multiple conditions are limited and so patients with these conditions are being  
5 enrolled consecutively.  
6

7  
8 The health facilities have a high volume of patients with HIV-infection and with hypertension. Some  
9 health facilities do not offer appointments and so there is no way of knowing who will present the  
10 next day. In larger health facilities, appointments are given out in 3-4 blocks during the day so as to  
11 spread the patient load.  
12

13 Selection of patients using simple random sampling minimises bias but is difficult to achieve.  
14 Therefore, we are conducting systematic sampling to enrol patients with HIV-infection or  
15 hypertension – that is taking every 5<sup>th</sup> or 10<sup>th</sup> patient consecutively in order of their attendance at  
16 the health facility, depending on the patient load. If the study team are late arriving at the facility, or  
17 if a patient refuses to join the study, then they maintain the systematic sequence and start at the  
18 next sequence number (i.e. offer enrolment to the next 5<sup>th</sup> or next 10<sup>th</sup> patient).  
19

20  
21 In the HIV or hypertension clinics, patients' details are entered onto a clinic register when they arrive  
22 and research staff use the register to determine the first patient for enrolment, second patient and  
23 so on.  
24

25 Sampled patients are then invited to participate in the trial following written informed consent.  
26

#### 27 **RANDOMISATION:**

28 The study is cluster-randomised since the intervention is delivered at a clinic level.  
29

30  
31 There is considerable variation in infrastructure and service provision between health facilities.  
32 Therefore, to ensure balance between the intervention and control arms, we stratified the  
33 randomisation. The strata comprised:  
34

- 35  
36 A. District hospitals, or large health centres:  
37 B. Health centres or large dispensaries  
38 C. Not-for-profit health facilities:  
39

40 Within each stratum, we randomised facilities in a 1:1 ratio to either integrated care or standard  
41 care using a permuted block randomisation method generated by SAS<sup>®</sup> PROC PLAN.  
42

43 We considered changing the mode of care entirely for all patients at each clinic to either integrated  
44 or vertical care, depending on the randomisation. This would have replicated real life health care  
45 delivery. However, it would have represented a major change for the health services, without the  
46 evidence to support such a move. It would also have meant that those people who were currently  
47 receiving vertical care and did not wish to change, would not have had the choice to continue.  
48 Therefore, although randomised by clinic, we are enrolling only a small proportion of the very many  
49 patients attending health services at the clinic. In the clinics randomised to provide integrated care,  
50 they are the sole point of integration in that facility for HIV-infection, diabetes and hypertension as  
51 integrated services are not provided anywhere else in either country.  
52  
53

#### 54 **PRIMARY ENDPOINTS:**

55  
56 The study has 2 co-primary endpoints, which will be ascertained over a 12-month follow-up:  
57  
58  
59  
60

- 1
- 2
- 3
- 4 - **Retention in care** for patients on diabetes and hypertension management. This is measured
- 5 as the proportion of people alive and in care at 12 months of follow-up.
- 6
- 7 - **Plasma viral load suppression** among persons HIV-infected. This is defined as plasma viral
- 8 load less than 1000 copies per ml.
- 9

10 We will define a participant as being retained in care if he/she has attended clinic for their routine 6-  
11 month assessment or anytime after that and in the subsequent 6-months (i.e. up to month 12), that  
12 he/she has not been declared lost to follow-up, has not withdrawn and has not died.

13  
14 Participants who have transferred away for their care will be contacted by phone. In many cases,  
15 this will be because of referral for specialist care. If they are still in care in the places that they  
16 transferred out to, then they will be assumed to be retained for the purposes of the primary  
17 analysis.

18  
19  
20 Viral suppression will be defined as a viral load of <1000 copies per ml (or reported as undetectable  
21 viral load). Any viral load measurements taken at or after 6 months after enrolment in the trial will  
22 be used in this endpoint analysis.

23  
24 *Rationale:* Retention in care is fundamental to disease control and has been very low for people with  
25 diabetes or hypertension in African settings, even where health care and medicines are provided for  
26 free. It is also a common indicator to both conditions.

27  
28  
29 We considered blood pressure and glycaemia control as primary endpoints but decided on retention  
30 as that is the immediate aim of our intervention. Once African health services can achieve good  
31 retention, the next stage of the research will be to assess impact on clinical indicators. At present,  
32 there are few reliable background data from Africa on blood pressure and glycaemia control  
33 achieved by populations able to access treatments. However, in high-income countries, only about 1  
34 in 4 persons with known hypertension and 1 in 2 persons with known diabetes achieve adequate  
35 blood pressure and glycaemia control respectively, and control is poorer in low-resource settings<sup>19-  
36 22</sup>.

37  
38  
39 We also considered a disease-based composite outcome such as either a stroke, myocardial  
40 infarction, or all cause-mortality, but this would need many years of follow-up. Also, given the poor  
41 retention in care, measuring disease incidence is fraught with bias. For these reasons, we chose  
42 retention as one of the primary endpoints.

43  
44  
45 The trial will also test whether there is an adverse effect of integrated services on HIV outcomes. In  
46 other words, does integration lead to poorer HIV viral suppression as compared with standard  
47 vertical care? To answer this question, HIV viral load was selected as a co-primary endpoint.

48  
49  
50 Secondary endpoints will include control of blood pressure and glycaemia, cost of illness and health  
51 care, incidence of clinical events including hospital admissions and deaths and plasma viral load >100  
52 copies per ml. Definitions of the control of blood pressure will include achieving a blood pressure  
53 <140/90 mm Hg and of diabetes as achieving fasting blood glucose <7mmol/l. The indicators will also  
54 be analysed on a continuum.

55  
56  
57 Although the study has two co-primary outcomes, they are being measured in different populations,  
58 one among people with hypertension or diabetes and the other in people with HIV-infection. The  
59 plasma viral load is also a safety outcome in that we wish test whether integration does harm to  
60

outcomes of people with HIV-infection. Therefore, we will not adjust the final analyses for multiplicity.

### Sample size considerations

*i). Retention in care endpoint.* We assumed that with the training and improved procedures, retention in care for persons with diabetes and hypertension would improve under current standard care – probably to a figure around 60 - 70%. As a comparison, for HIV-infection, this figure was around 70-80% prior to about 2006 and is generally around 90% today<sup>23</sup>.

We hypothesised that in the intervention arm, integration would lead to further improved retention rates compared with the standard vertical care for diabetes and hypertension. Thus, this endpoint was powered on an assumption of superiority.

The sample size calculation must take clustering at health facility into account (i.e. the variation between health facilities as well as variation between patients). We have done this for different values of the intra-class correlation coefficient. This is a measure of the variation between health facilities, which we can minimise between arms by stratification. In many trials, the intra-class correlation coefficient is assumed to be 0.05 but we were conservative in accepting a higher level of variation of 0.06<sup>24,25</sup>.

The calculations show that for hypertension and diabetes, if the retention in the standard vertical care arm is 60% at 12 months, then 32 facilities (16 randomised to integration and 16 to standard vertical care), with 100 patients studied in each facility, will provide 90% power to detect an absolute difference of 15% between the two study arms (i.e. a retention of 60% versus 75% respectively in the standard care and intervention arms) (Table 1). If the variation between health facilities turns out to be higher (i.e. intra-class coefficient is 0.07, power will still exceed 80%). If the retention rate in the control arm is 70%, then power to detect differences will be even higher.

We will enrol 110 patients in each of the 32 facilities to allow for a 10% refusal rate. This refusal rate is conservative as in previous large studies in these settings, our refusal rate has been close to zero<sup>26</sup>. The group of 110 patients in each facility will be a mix of persons with either diabetes or hypertension or both conditions. The total number of patients within this randomised evaluation will be 3,520.

**Table 1. Total number of facilities needed in both arms to demonstrate absolute differences of between 10% to 20% for different values of variation between health facilities (intra-class coefficient of variation) and of numbers of patients needed in each facility. The calculations assume 90% power and a 2-sided significance level of 5%.**

| Intra-class coefficient of variation | Number of patients per facility | Proportion retained in care in the integrated care arm |     |     |
|--------------------------------------|---------------------------------|--------------------------------------------------------|-----|-----|
|                                      |                                 | 70%                                                    | 75% | 80% |
| 0.05                                 | 50                              | 74                                                     | 32  | 18  |
| 0.06                                 | 50                              | 84                                                     | 36  | 20  |
| 0.07                                 | 50                              | 94                                                     | 40  | 22  |
| 0.05                                 | 100                             | 64                                                     | 28  | 16  |

|      |     |    |    |    |
|------|-----|----|----|----|
| 0.06 | 100 | 74 | 32 | 18 |
| 0.07 | 100 | 86 | 36 | 20 |
|      |     |    |    |    |
| 0.05 | 200 | 60 | 26 | 14 |
| 0.06 | 200 | 70 | 30 | 16 |
| 0.07 | 200 | 80 | 34 | 20 |
|      |     |    |    |    |

ii). *HIV plasma viral load endpoint*. The sample size for the HIV component is calculated to show non-inferiority between the integration and the standard vertical care arms. We will enrol the same number of persons with HIV-infection (3,520 comprising 110 patients in each of 32 facilities) as the number with hypertension or diabetes in the cluster-randomised trial.

The numbers of HIV-infected people with known diabetes, hypertension or both is likely to be small as testing is limited across Africa. We will enrol all patients with known multimorbidity to add to the 3,520 HIV-infected persons and 3,520 with diabetes or hypertension.

In terms of virologic suppression, if we assume that this is 85% at 12 months in the standard care arm, we will have 90% power to show non-inferiority between the 2 arms to a  $\Delta=10\%$  margin (i.e. that the upper limit of the one-sided 95% confidence interval of the difference between the standard care and intervention arms will not exceed 10%). This also assumes an intra-class coefficient of variation of 0.06 and 1-sided 95% confidence interval.

### Health economics endpoints

A sub-study on costs is nested in the trial. Its aim is to provide evidence on the costs associated with accessing care for study participants and the costs of delivering care from the health providers perspective.

The economic evaluation will be based on the clinical and operational outcome parameters to define the economic effectiveness outcomes. The primary outcomes will be the incremental cost per additional person retained in the programme and the incremental cost per additional person virologically suppressed. Other outcomes will be the health care cost per patient category per year in integrated care and standard care, the average health care costs per additional patient treated and the change in the average health care costs / societal cost per additional patient with a controlled condition.

Given that costs and benefits of integrated care services may extend beyond the follow up period and that these chronic conditions have lifelong consequences, we will construct an individual-based microsimulation model to estimate the long-term and lifelong cost-effectiveness of different methods of care for patients with different conditions and explore the cost-effectiveness of future scale up of these health care approaches.

### Statistical analysis

The primary indicators will be compared between the intervention arm and standard care, while controlling for possible confounders, defined *a priori*. General estimating equation models will be used for the analysis to take account of clustering of data within health facilities.

1  
2  
3 The primary measure of effectiveness for the primary outcomes will be absolute risk differences and  
4 risk ratios. Time to event analysis – i.e. time to loss from care – will also be conducted. We will not  
5 adjust for multiple comparisons. Although we have 2 co-primary endpoints, they are in different  
6 populations.  
7

8  
9 An intention-to-treat analysis strategy will be used for the primary analysis. Every effort will be made  
10 to minimise missing outcome data at each visit. Sensitivity analyses will be conducted to assess the  
11 robustness of the missing data assumption made in the primary analysis. Detailed statistical analyses  
12 will be described in the statistical analysis plan.  
13

### 14 15 **Process Evaluation**

16  
17 Concurrent process evaluation is being done alongside the implementation of INTE-AFRICA to  
18 understand the context, description of the intervention and its causal assumptions, implementation,  
19 mechanisms of impact and outcomes and document stakeholders experiences, attitudes, and  
20 practices during implementation, and to understand the impact of structural and contextual factors  
21 (macro/meso/micro) on implementation<sup>27</sup>. This is described elsewhere<sup>4</sup>.  
22  
23

### 24 25 **Data management.**

26  
27 The study is run in accordance with good clinical practice. This involves regular monitoring of  
28 procedures and checking of data collected. A custom electronic database has been designed for the  
29 trial. Staff received training on the electronic database as well as on how to report issues and make  
30 suggestions. Trial data are collected and validated electronically in real-time with built in data-type  
31 and logic checks with the patient at the point of care. The real-time validation logic is custom to the  
32 protocol and references new and existing patient data for immediate feedback to the user. Data  
33 modifications are tracked in a comprehensive electronic audit trail so as to not obscure changes.  
34 Changes to the source code of the electronic database are tracked and versioned. The current  
35 software version is stamped on each record as it is modified.  
36  
37

38 Data may be viewed, created, modified, deleted or exported by delegated persons according to the  
39 access roles associated with their personal accounts. The sponsor and other relevant parties may be  
40 given access to data separately with suitable notice. Security of data is ensured using authentication  
41 and encryption to render subject identity and personal health information unusable, unreadable and  
42 indecipherable to unauthorised individuals. The application and database layers use a combination  
43 of hashing and field-level encryption for sensitive and personal data. Study data are not stored on  
44 devices in the field.  
45  
46

### 47 48 **Ethics and Dissemination**

49 The protocol has been approved by ethics committee of The AIDS Support Organisation, Uganda  
50 (reference number TASOREC/090/19-UG-REC-009), National Institute of Medical Research,  
51 Tanzania (reference number NIMR/HQ/R.8a/Vol. IX/3394, 23/03/2020) and the Liverpool  
52 School of Tropical Medicine, UK (reference number 19-100, 02/07/2020).  
53  
54

55 The findings of the study will be shared with policy makers and senior programme  
56 managers, with civil societies (including the East African NCDs Alliance, the Tanzania  
57 Diabetes Association and others), with patient groups and with the participants. The  
58 findings will also be published in peer-reviewed journals.  
59  
60

## DISCUSSION.

In this trial, we are testing the concept of a single chronic care clinic where people living with any one or more of the target conditions – HIV-infection, diabetes or hypertension – may come for health services and care. Very few settings in Africa have even attempted screening of people with HIV-infection for chronic conditions, despite their high prevalence. To our knowledge, there have been no attempts of a fully integrated approach to these chronic conditions as being tested in this trial.

This approach is controversial on a number of fronts. The HIV programmes are well funded and have achieved high levels of coverage of antiretroviral therapy across Africa, and we are asking them to merge with much weaker programmes. Patients have traditionally been managed in standalone specialist clinics and were now asking them to move to management by generalist clinical staff, which will seem inferior to many specialists. Finally, patients with HIV-infection have always been segregated from others, and we are now asking everyone to sit together, which will be uncomfortable to some due to the stigma associated with HIV-infection.

Furthermore, the research programme cannot compensate government clinical staff for the added time that the research will take, pay for medicines or compensate patients for their time, unlike the situation in many clinical trials. For our findings to be relevant to policy-makers and other stakeholders, health care must be provided in close to normal health service conditions.

Central to the success of such research is the development of partnerships with policy makers, health care managers and providers, patient groups and community representatives. Each of these stakeholders, in particular the policy makers, are consulted at regular intervals and to date, they have given considerable time in setting the research strategy and the design and implementation of the research studies. Over time we created formal structures to ensure their voices were heard. Each country has a steering committee that includes representatives of the stakeholders, and which meets at least 3-monthly. We also have an international steering committee, which includes representation from the different partners and is dominated by independent researchers.

The study also involves researchers from multiple different disciplines, including clinical trialists and statisticians, social scientists and health economists, clinical researchers and programme managers and from both African and European institutions. Crucial to the success of the research programme to date has been that we operate on an ethos of equality and openness. This means that meetings are inclusive opportunity and support where needed is given to people to contribute. We have also invested in training in communications and unconscious bias.

We have focussed on just 3 conditions, and of the non-communicable conditions, we chose diabetes and hypertension as these are responsible for a very high disease burden and are probably more modifiable by intervention than many other chronic conditions. However, we see the test of these 3 conditions in integration as a test of proof of concept so that if integration is shown to be effective, expansion to include other conditions could be considered.

1  
2  
3 Although the trial is large, we are testing integration in a small proportion of patients attending  
4 health facilities. The evidence was simply lacking to change the health care model at each clinic.  
5 Thus, further research will be needed to estimate the effects of transforming entire clinics to  
6 integration.  
7

8  
9 We did consider other study designs to answer our question. For example, it would have been  
10 possible to recruit patients in integrated and in vertical care from the same health facilities as the  
11 clinics often run on different days. This could have reduced costs; but risked greater contamination  
12 between the intervention and control arms and risked confusion among busy clinical staff and  
13 facility managers.  
14

15 A challenge of such cluster-randomised trials is that participants and clinicians cannot be blinded,  
16 and further, that people may have their biases of which intervention should work. Thus, we have  
17 restricted evaluation to largely biomedical objective endpoints. We also train staff regularly,  
18 reminding them of the critical role of equipoise in trials.  
19  
20  
21  
22  
23

#### 24 **Contributorship statement.**

25  
26 SGM, MJN, SJ wrote the original protocol, secured funding and wrote the first draft of the protocol  
27 and designed the study. SGM, GM, JMg, JMu, MCVH, MB, AG, DB, WC, LWN, EHS, KR, DW, LEC, BME,  
28 JVL, SMA, SMe, KM contributed to the design of the study and to various versions of the protocol  
29 and this paper. JL, GG, NS, PGS, AK also contributed to the study design and oversaw the study as  
30 members of the study steering committee. SK, JB, IN, co-ordinated the implementation of the study  
31 in Tanzania and Uganda with support from JO. EVW designed the data systems.  
32  
33

34 We would like to thank all of our patient representatives and focus discussion groups who have  
35 contributed to our research.  
36  
37

#### 38 **Competing interests**

39  
40 There are no competing interests for any author  
41  
42

#### 43 **Funding**

44  
45 This work is funded by the EU Horizon 2020 programme, grant number 825698.  
46  
47

#### 48 **REFERENCES**

- 49  
50 1. Atun R, Davies JI, Gale EAM, et al. Diabetes in sub-Saharan Africa: from clinical care to health  
51 policy. *Lancet Diabetes Endocrinol* 2017; **5**(8): 622-67.  
52 2. Collaborators GBDRF. Global, regional, and national comparative risk assessment of 79  
53 behavioural, environmental and occupational, and metabolic risks or clusters of risks, 1990-2015: a  
54 systematic analysis for the Global Burden of Disease Study 2015. *Lancet* 2016; **388**(10053): 1659-  
55 724.  
56 3. Organisation WH. World Health Organisation fact sheets. (accessed 4th April 2020).  
57 4. Van Hout MC, Bachmann M, Lazarus JV, et al. Strengthening integration of chronic care in  
58 Africa: protocol for the qualitative process evaluation of integrated HIV, diabetes and hypertension  
59  
60



- care in a cluster randomised controlled trial in Tanzania and Uganda. *BMJ Open* 2020; **10**(10): e039237.
5. Dudley L, Garner P. Strategies for integrating primary health services in low- and middle-income countries at the point of delivery. *Cochrane Database Syst Rev* 2011; (7): CD003318.
  6. Haregu TN, Setswe G, Elliott J, Oldenburg B. Integration of HIV/AIDS and noncommunicable diseases in developing countries: rationale, policies and models. *Int J Healthcare* 2015; **1**(1): 21-7.
  7. Haldane V, Legido-Quigley H, Chuah FLH, et al. Integrating cardiovascular diseases, hypertension, and diabetes with HIV services: a systematic review. *AIDS Care* 2018; **30**(1): 103-15.
  8. Khabala KB, Edwards JK, Baruani B, et al. Medication Adherence Clubs: a potential solution to managing large numbers of stable patients with multiple chronic diseases in informal settlements. *Trop Med Int Health* 2015; **20**(10): 1265-70.
  9. Ameh S. Evaluation of an integrated HIV and hypertension management model in rural south africa: a mixed methods approach. *Glob Health Action* 2020; **13**(1): 1750216.
  10. Mahomed OH, Asmall S. Development and implementation of an integrated chronic disease model in South Africa: lessons in the management of change through improving the quality of clinical practice. *Int J Integr Care* 2015; **15**: e038.
  11. Shiri T, Birungi J, Garrib A, et al. Integrated HIV, diabetes, and hypertension ambulatory health services in low-income settings – an empirical socio-economic cohort study in Tanzania and Uganda. . *BMC Med* In Press.
  12. Adeyemi O, Lyons M, Njim T, et al. Integration of non-communicable disease and HIV/AIDS management: a review of healthcare policies and plans in East Africa. *BMJ Glob Health* 2021; **6**(5).
  13. Bintabara D, Ngajilo D. Readiness of health facilities for the outpatient management of non-communicable diseases in a low-resource setting: an example from a facility-based cross-sectional survey in Tanzania. *BMJ Open* 2020; **10**(11): e040908.
  14. Bintabara D, Shayo FK. Disparities in availability of services and prediction of the readiness of primary healthcare to manage diabetes in Tanzania. *Prim Care Diabetes* 2021; **15**(2): 365-71.
  15. Katende D, Mutungi G, Baisley K, et al. Readiness of Ugandan health services for the management of outpatients with chronic diseases. *Trop Med Int Health* 2015; **20**(10): 1385-95.
  16. Ford N, Ball A, Baggaley R, et al. The WHO public health approach to HIV treatment and care: looking back and looking ahead. *Lancet Infect Dis* 2018; **18**(3): e76-e86.
  17. Jaffar S, Amuron B, Birungi J, et al. Integrating research into routine service delivery in an antiretroviral treatment programme: lessons learnt from a cluster randomized trial comparing strategies of HIV care in Jinja, Uganda. *Trop Med Int Health* 2008; **13**(6): 795-800.
  18. Shayo E, Van Hout MC, Birungi J, et al. Ethical issues in intervention studies on the prevention and management of diabetes and hypertension in sub-Saharan Africa. *BMJ Glob Health* 2020; **5**(7).
  19. (CDC) CfDCaP. Hypertension Cascade: Hypertension Prevalence, Treatment and Control Estimates Among US Adults Aged 18 Years and Older Applying the Criteria From the American College of Cardiology and American Heart Association’s 2017 Hypertension Guideline—NHANES 2013–2016. <https://millionhearts.hhs.gov/data-reports/hypertension-prevalence.html>. 2019 (accessed 12 November 2020).
  20. Gill G, Gebrekidan A, English P, Wile D, Tesfaye S. Diabetic complications and glycaemic control in remote North Africa. *QJM* 2008; **101**(10): 793-8.
  21. Manne-Goehler J, Geldsetzer P, Agoudavi K, et al. Health system performance for people with diabetes in 28 low- and middle-income countries: A cross-sectional study of nationally representative surveys. *PLoS Med* 2019; **16**(3): e1002751.
  22. Mills KT, Bundy JD, Kelly TN, et al. Global Disparities of Hypertension Prevalence and Control: A Systematic Analysis of Population-Based Studies From 90 Countries. *Circulation* 2016; **134**(6): 441-50.

- 1  
2  
3 23. Rosen S, Fox MP, Gill CJ. Patient retention in antiretroviral therapy programs in sub-Saharan  
4 Africa: a systematic review. *PLoS Med* 2007; **4**(10): e298.  
5 24. Adams G, Gulliford MC, Ukoumunne OC, Eldridge S, Chinn S, Campbell MJ. Patterns of intra-  
6 cluster correlation from primary care research to inform study design and analysis. *J Clin Epidemiol*  
7 2004; **57**(8): 785-94.  
8 25. Campbell MK, Fayers PM, Grimshaw JM. Determinants of the intracluster correlation  
9 coefficient in cluster randomized trials: the case of implementation research. *Clin Trials* 2005; **2**(2):  
10 99-107.  
11 26. Mfinanga S, Chanda D, Kivuyo SL, et al. Cryptococcal meningitis screening and community-  
12 based early adherence support in people with advanced HIV infection starting antiretroviral therapy  
13 in Tanzania and Zambia: an open-label, randomised controlled trial. *Lancet* 2015; **385**(9983): 2173-  
14 82.  
15 27. Craig P, Dieppe P, Macintyre S, et al. Developing and evaluating complex interventions: the  
16 new Medical Research Council guidance. *BMJ* 2008; **337**: a1655.  
17  
18  
19  
20  
21  
22

### 23 Figure legends

#### 27 Figure 1:

29 Trial schema. The INTE-AFRICA trial: a pragmatic parallel arm cluster-randomised trial  
30  
31  
32  
33  
34  
35  
36  
37  
38  
39  
40  
41  
42  
43  
44  
45  
46  
47  
48  
49  
50  
51  
52  
53  
54  
55  
56  
57  
58  
59  
60





STANDARD PROTOCOL ITEMS: RECOMMENDATIONS FOR INTERVENTIONAL TRIALS

## Integrating HIV, diabetes and hypertension services in Africa: study protocol for a cluster-randomised trial in Tanzania and Uganda.

SPIRIT 2013 Checklist: Recommended items to address in a clinical trial protocol and related documents\*

| Section/item                      | Item No | Description                                                                                                                                                                                                                                                                              | Page  |
|-----------------------------------|---------|------------------------------------------------------------------------------------------------------------------------------------------------------------------------------------------------------------------------------------------------------------------------------------------|-------|
| <b>Administrative information</b> |         |                                                                                                                                                                                                                                                                                          |       |
| Title                             | 1       | Descriptive title identifying the study design, population, interventions, and, if applicable, trial acronym                                                                                                                                                                             | 1     |
| Trial registration                | 2a      | Trial identifier and registry name. If not yet registered, name of intended registry                                                                                                                                                                                                     | 2     |
|                                   | 2b      | All items from the World Health Organization Trial Registration Data Set                                                                                                                                                                                                                 |       |
| Protocol version                  | 3       | Date and version identifier                                                                                                                                                                                                                                                              | 11    |
| Funding                           | 4       | Sources and types of financial, material, and other support                                                                                                                                                                                                                              | 14    |
| Roles and responsibilities        | 5a      | Names, affiliations, and roles of protocol contributors                                                                                                                                                                                                                                  | 1, 14 |
|                                   | 5b      | Name and contact information for the trial sponsor                                                                                                                                                                                                                                       | 12    |
|                                   | 5c      | Role of study sponsor and funders, if any, in study design; collection, management, analysis, and interpretation of data; writing of the report; and the decision to submit the report for publication, including whether they will have ultimate authority over any of these activities | 14    |
|                                   | 5d      | Composition, roles, and responsibilities of the coordinating centre, steering committee, endpoint adjudication committee, data management team, and other individuals or groups overseeing the trial, if applicable (see Item 21a for data monitoring committee)                         | 12    |

### Introduction

|    |                                                           |     |                                                        |            |
|----|-----------------------------------------------------------|-----|--------------------------------------------------------|------------|
| 1  |                                                           |     |                                                        |            |
| 2  | Background and                                            | 6a  | Description of research question and justification     | 3          |
| 3  | rationale                                                 |     | for undertaking the trial, including summary of        |            |
| 4  |                                                           |     | relevant studies (published and unpublished)           |            |
| 5  |                                                           |     | examining benefits and harms for each                  |            |
| 6  |                                                           |     | intervention                                           |            |
| 7  |                                                           |     |                                                        |            |
| 8  |                                                           |     |                                                        |            |
| 9  |                                                           | 6b  | Explanation for choice of comparators                  | 3-4        |
| 10 | Objectives                                                | 7   | Specific objectives or hypotheses                      | 3          |
| 11 |                                                           |     |                                                        |            |
| 12 | Trial design                                              | 8   | Description of trial design including type of trial    | 3          |
| 13 |                                                           |     | (eg, parallel group, crossover, factorial, single      |            |
| 14 |                                                           |     | group), allocation ratio, and framework (eg,           |            |
| 15 |                                                           |     | superiority, equivalence, noninferiority,              |            |
| 16 |                                                           |     | exploratory)                                           |            |
| 17 |                                                           |     |                                                        |            |
| 18 |                                                           |     |                                                        |            |
| 19 |                                                           |     |                                                        |            |
| 20 | <b>Methods: Participants, interventions, and outcomes</b> |     |                                                        |            |
| 21 |                                                           |     |                                                        |            |
| 22 | Study setting                                             | 9   | Description of study settings (eg, community clinic,   | 5-7        |
| 23 |                                                           |     | academic hospital) and list of countries where data    |            |
| 24 |                                                           |     | will be collected. Reference to where list of study    |            |
| 25 |                                                           |     | sites can be obtained                                  |            |
| 26 |                                                           |     |                                                        |            |
| 27 | Eligibility criteria                                      | 10  | Inclusion and exclusion criteria for participants. If  | 5-7        |
| 28 |                                                           |     | applicable, eligibility criteria for study centres and |            |
| 29 |                                                           |     | individuals who will perform the interventions (eg,    |            |
| 30 |                                                           |     | surgeons, psychotherapists)                            |            |
| 31 |                                                           |     |                                                        |            |
| 32 |                                                           |     |                                                        |            |
| 33 | Interventions                                             | 11a | Interventions for each group with sufficient detail    | 4          |
| 34 |                                                           |     | to allow replication, including how and when they      |            |
| 35 |                                                           |     | will be administered                                   |            |
| 36 |                                                           |     |                                                        |            |
| 37 |                                                           |     |                                                        |            |
| 38 |                                                           | 11b | Criteria for discontinuing or modifying allocated      | Not        |
| 39 |                                                           |     | interventions for a given trial participant (eg, drug  | Applicable |
| 40 |                                                           |     | dose change in response to harms, participant          |            |
| 41 |                                                           |     | request, or improving/worsening disease)               |            |
| 42 |                                                           |     |                                                        |            |
| 43 |                                                           | 11c | Strategies to improve adherence to intervention        | 4          |
| 44 |                                                           |     | protocols, and any procedures for monitoring           |            |
| 45 |                                                           |     | adherence (eg, drug tablet return, laboratory tests)   |            |
| 46 |                                                           |     |                                                        |            |
| 47 |                                                           |     |                                                        |            |
| 48 |                                                           | 11d | Relevant concomitant care and interventions that       | Not        |
| 49 |                                                           |     | are permitted or prohibited during the trial           | Applicable |
| 50 |                                                           |     |                                                        |            |
| 51 |                                                           |     |                                                        |            |
| 52 |                                                           |     |                                                        |            |
| 53 |                                                           |     |                                                        |            |
| 54 |                                                           |     |                                                        |            |
| 55 |                                                           |     |                                                        |            |
| 56 |                                                           |     |                                                        |            |
| 57 |                                                           |     |                                                        |            |
| 58 |                                                           |     |                                                        |            |
| 59 |                                                           |     |                                                        |            |
| 60 |                                                           |     |                                                        |            |

|    |                                                                     |     |                                                                                                                                                                                                                                                                                                                                                                                |                             |
|----|---------------------------------------------------------------------|-----|--------------------------------------------------------------------------------------------------------------------------------------------------------------------------------------------------------------------------------------------------------------------------------------------------------------------------------------------------------------------------------|-----------------------------|
| 1  |                                                                     |     |                                                                                                                                                                                                                                                                                                                                                                                |                             |
| 2  | Outcomes                                                            | 12  | Primary, secondary, and other outcomes, including the specific measurement variable (eg, systolic blood pressure), analysis metric (eg, change from baseline, final value, time to event), method of aggregation (eg, median, proportion), and time point for each outcome. Explanation of the clinical relevance of chosen efficacy and harm outcomes is strongly recommended | 8-9                         |
| 3  |                                                                     |     |                                                                                                                                                                                                                                                                                                                                                                                |                             |
| 4  |                                                                     |     |                                                                                                                                                                                                                                                                                                                                                                                |                             |
| 5  |                                                                     |     |                                                                                                                                                                                                                                                                                                                                                                                |                             |
| 6  |                                                                     |     |                                                                                                                                                                                                                                                                                                                                                                                |                             |
| 7  |                                                                     |     |                                                                                                                                                                                                                                                                                                                                                                                |                             |
| 8  |                                                                     |     |                                                                                                                                                                                                                                                                                                                                                                                |                             |
| 9  |                                                                     |     |                                                                                                                                                                                                                                                                                                                                                                                |                             |
| 10 |                                                                     |     |                                                                                                                                                                                                                                                                                                                                                                                |                             |
| 11 |                                                                     |     |                                                                                                                                                                                                                                                                                                                                                                                |                             |
| 12 | Participant timeline                                                | 13  | Time schedule of enrolment, interventions (including any run-ins and washouts), assessments, and visits for participants. A schematic diagram is highly recommended (see Figure)                                                                                                                                                                                               | 3                           |
| 13 |                                                                     |     |                                                                                                                                                                                                                                                                                                                                                                                |                             |
| 14 |                                                                     |     |                                                                                                                                                                                                                                                                                                                                                                                |                             |
| 15 |                                                                     |     |                                                                                                                                                                                                                                                                                                                                                                                |                             |
| 16 |                                                                     |     |                                                                                                                                                                                                                                                                                                                                                                                |                             |
| 17 |                                                                     |     |                                                                                                                                                                                                                                                                                                                                                                                |                             |
| 18 |                                                                     |     |                                                                                                                                                                                                                                                                                                                                                                                |                             |
| 19 | Sample size                                                         | 14  | Estimated number of participants needed to achieve study objectives and how it was determined, including clinical and statistical assumptions supporting any sample size calculations                                                                                                                                                                                          | 9-10                        |
| 20 |                                                                     |     |                                                                                                                                                                                                                                                                                                                                                                                |                             |
| 21 |                                                                     |     |                                                                                                                                                                                                                                                                                                                                                                                |                             |
| 22 |                                                                     |     |                                                                                                                                                                                                                                                                                                                                                                                |                             |
| 23 |                                                                     |     |                                                                                                                                                                                                                                                                                                                                                                                |                             |
| 24 |                                                                     |     |                                                                                                                                                                                                                                                                                                                                                                                |                             |
| 25 |                                                                     |     |                                                                                                                                                                                                                                                                                                                                                                                |                             |
| 26 | Recruitment                                                         | 15  | Strategies for achieving adequate participant enrolment to reach target sample size                                                                                                                                                                                                                                                                                            | 7                           |
| 27 |                                                                     |     |                                                                                                                                                                                                                                                                                                                                                                                |                             |
| 28 |                                                                     |     |                                                                                                                                                                                                                                                                                                                                                                                |                             |
| 29 |                                                                     |     |                                                                                                                                                                                                                                                                                                                                                                                |                             |
| 30 | <b>Methods: Assignment of interventions (for controlled trials)</b> |     |                                                                                                                                                                                                                                                                                                                                                                                |                             |
| 31 | Allocation:                                                         |     |                                                                                                                                                                                                                                                                                                                                                                                |                             |
| 32 |                                                                     |     |                                                                                                                                                                                                                                                                                                                                                                                |                             |
| 33 | Sequence generation                                                 | 16a | Method of generating the allocation sequence (eg, computer-generated random numbers), and list of any factors for stratification. To reduce predictability of a random sequence, details of any planned restriction (eg, blocking) should be provided in a separate document that is unavailable to those who enrol participants or assign interventions                       | 7                           |
| 34 |                                                                     |     |                                                                                                                                                                                                                                                                                                                                                                                |                             |
| 35 |                                                                     |     |                                                                                                                                                                                                                                                                                                                                                                                |                             |
| 36 |                                                                     |     |                                                                                                                                                                                                                                                                                                                                                                                |                             |
| 37 |                                                                     |     |                                                                                                                                                                                                                                                                                                                                                                                |                             |
| 38 |                                                                     |     |                                                                                                                                                                                                                                                                                                                                                                                |                             |
| 39 |                                                                     |     |                                                                                                                                                                                                                                                                                                                                                                                |                             |
| 40 |                                                                     |     |                                                                                                                                                                                                                                                                                                                                                                                |                             |
| 41 |                                                                     |     |                                                                                                                                                                                                                                                                                                                                                                                |                             |
| 42 |                                                                     |     |                                                                                                                                                                                                                                                                                                                                                                                |                             |
| 43 |                                                                     |     |                                                                                                                                                                                                                                                                                                                                                                                |                             |
| 44 | Allocation concealment mechanism                                    | 16b | Mechanism of implementing the allocation sequence (eg, central telephone; sequentially numbered, opaque, sealed envelopes), describing any steps to conceal the sequence until interventions are assigned                                                                                                                                                                      | Not Applicable              |
| 45 |                                                                     |     |                                                                                                                                                                                                                                                                                                                                                                                |                             |
| 46 |                                                                     |     |                                                                                                                                                                                                                                                                                                                                                                                |                             |
| 47 |                                                                     |     |                                                                                                                                                                                                                                                                                                                                                                                |                             |
| 48 |                                                                     |     |                                                                                                                                                                                                                                                                                                                                                                                |                             |
| 49 |                                                                     |     |                                                                                                                                                                                                                                                                                                                                                                                |                             |
| 50 |                                                                     |     |                                                                                                                                                                                                                                                                                                                                                                                |                             |
| 51 | Implementation                                                      | 16c | Who will generate the allocation sequence, who will enrol participants, and who will assign participants to interventions                                                                                                                                                                                                                                                      | 7                           |
| 52 |                                                                     |     |                                                                                                                                                                                                                                                                                                                                                                                |                             |
| 53 |                                                                     |     |                                                                                                                                                                                                                                                                                                                                                                                |                             |
| 54 |                                                                     |     |                                                                                                                                                                                                                                                                                                                                                                                |                             |
| 55 |                                                                     |     |                                                                                                                                                                                                                                                                                                                                                                                |                             |
| 56 | Blinding (masking)                                                  | 17a | Who will be blinded after assignment to interventions (eg, trial participants, care providers, outcome assessors, data analysts), and how                                                                                                                                                                                                                                      | Not Applicable, see page 14 |
| 57 |                                                                     |     |                                                                                                                                                                                                                                                                                                                                                                                |                             |
| 58 |                                                                     |     |                                                                                                                                                                                                                                                                                                                                                                                |                             |
| 59 |                                                                     |     |                                                                                                                                                                                                                                                                                                                                                                                |                             |
| 60 |                                                                     |     |                                                                                                                                                                                                                                                                                                                                                                                |                             |

1  
2  
3  
4  
5  
6  
7  
8  
9  
10  
11  
12  
13  
14  
15  
16  
17  
18  
19  
20  
21  
22  
23  
24  
25  
26  
27  
28  
29  
30  
31  
32  
33  
34  
35  
36  
37  
38  
39  
40  
41  
42  
43  
44  
45  
46  
47  
48  
49  
50  
51  
52  
53  
54  
55  
56  
57  
58  
59  
60

17b If blinded, circumstances under which unblinding is permissible, and procedure for revealing a participant's allocated intervention during the trial

### Methods: Data collection, management, and analysis

Data collection methods 18a Plans for assessment and collection of outcome, baseline, and other trial data, including any related processes to promote data quality (eg, duplicate measurements, training of assessors) and a description of study instruments (eg, questionnaires, laboratory tests) along with their reliability and validity, if known. Reference to where data collection forms can be found, if not in the protocol 5, 11

18b Plans to promote participant retention and complete follow-up, including list of any outcome data to be collected for participants who discontinue or deviate from intervention protocols 4-5,8

Data management 19 Plans for data entry, coding, security, and storage, including any related processes to promote data quality (eg, double data entry; range checks for data values). Reference to where details of data management procedures can be found, if not in the protocol 11

Statistical methods 20a Statistical methods for analysing primary and secondary outcomes. Reference to where other details of the statistical analysis plan can be found, if not in the protocol 11

20b Methods for any additional analyses (eg, subgroup and adjusted analyses) 11

20c Definition of analysis population relating to protocol non-adherence (eg, as randomised analysis), and any statistical methods to handle missing data (eg, multiple imputation) 11

### Methods: Monitoring

Data monitoring 21a Composition of data monitoring committee (DMC); summary of its role and reporting structure; statement of whether it is independent from the sponsor and competing interests; and reference to where further details about its charter can be found, if not in the protocol. Alternatively, an explanation of why a DMC is not needed 11

|                                 |     |                                                                                                                                                                                                                                  |                |
|---------------------------------|-----|----------------------------------------------------------------------------------------------------------------------------------------------------------------------------------------------------------------------------------|----------------|
|                                 | 21b | Description of any interim analyses and stopping guidelines, including who will have access to these interim results and make the final decision to terminate the trial                                                          | Not Applicable |
| Harms                           | 22  | Plans for collecting, assessing, reporting, and managing solicited and spontaneously reported adverse events and other unintended effects of trial interventions or trial conduct                                                | 3              |
| Auditing                        | 23  | Frequency and procedures for auditing trial conduct, if any, and whether the process will be independent from investigators and the sponsor                                                                                      | 11             |
| <b>Ethics and dissemination</b> |     |                                                                                                                                                                                                                                  |                |
| Research ethics approval        | 24  | Plans for seeking research ethics committee/institutional review board (REC/IRB) approval                                                                                                                                        | 12             |
| Protocol amendments             | 25  | Plans for communicating important protocol modifications (eg, changes to eligibility criteria, outcomes, analyses) to relevant parties (eg, investigators, REC/IRBs, trial participants, trial registries, journals, regulators) | 12             |
| Consent or assent               | 26a | Who will obtain informed consent or assent from potential trial participants or authorised surrogates, and how (see Item 32)                                                                                                     | 7              |
|                                 | 26b | Additional consent provisions for collection and use of participant data and biological specimens in ancillary studies, if applicable                                                                                            | Not Applicable |
| Confidentiality                 | 27  | How personal information about potential and enrolled participants will be collected, shared, and maintained in order to protect confidentiality before, during, and after the trial                                             | 11             |
| Declaration of interests        | 28  | Financial and other competing interests for principal investigators for the overall trial and each study site                                                                                                                    | 14             |
| Access to data                  | 29  | Statement of who will have access to the final trial dataset, and disclosure of contractual agreements that limit such access for investigators                                                                                  | 11             |
| Ancillary and post-trial care   | 30  | Provisions, if any, for ancillary and post-trial care, and for compensation to those who suffer harm from trial participation                                                                                                    | Not Applicable |



|    |                   |     |                                                        |            |
|----|-------------------|-----|--------------------------------------------------------|------------|
| 1  |                   |     |                                                        |            |
| 2  | Dissemination     | 31a | Plans for investigators and sponsor to                 | 12         |
| 3  | policy            |     | communicate trial results to participants,             |            |
| 4  |                   |     | healthcare professionals, the public, and other        |            |
| 5  |                   |     | relevant groups (eg, via publication, reporting in     |            |
| 6  |                   |     | results databases, or other data sharing               |            |
| 7  |                   |     | arrangements), including any publication               |            |
| 8  |                   |     | restrictions                                           |            |
| 9  |                   |     |                                                        |            |
| 10 |                   |     |                                                        |            |
| 11 |                   | 31b | Authorship eligibility guidelines and any intended     | 14         |
| 12 |                   |     | use of professional writers                            |            |
| 13 |                   |     |                                                        |            |
| 14 |                   | 31c | Plans, if any, for granting public access to the full  | 11         |
| 15 |                   |     | protocol, participant-level dataset, and statistical   |            |
| 16 |                   |     | code                                                   |            |
| 17 |                   |     |                                                        |            |
| 18 |                   |     |                                                        |            |
| 19 | <b>Appendices</b> |     |                                                        |            |
| 20 |                   |     |                                                        |            |
| 21 | Informed consent  | 32  | Model consent form and other related                   |            |
| 22 | materials         |     | documentation given to participants and                |            |
| 23 |                   |     | authorised surrogates                                  |            |
| 24 |                   |     |                                                        |            |
| 25 |                   |     |                                                        |            |
| 26 | Biological        | 33  | Plans for collection, laboratory evaluation, and       | Not        |
| 27 | specimens         |     | storage of biological specimens for genetic or         | Applicable |
| 28 |                   |     | molecular analysis in the current trial and for future |            |
| 29 |                   |     | use in ancillary studies, if applicable                |            |
| 30 |                   |     |                                                        |            |

---

\*It is strongly recommended that this checklist be read in conjunction with the SPIRIT 2013 Explanation & Elaboration for important clarification on the items. Amendments to the protocol should be tracked and dated. The SPIRIT checklist is copyrighted by the SPIRIT Group under the Creative Commons "[Attribution-NonCommercial-NoDerivs 3.0 Unported](https://creativecommons.org/licenses/by-nc-nd/3.0/)" license.
